# Supplementary material
Source: PubMed Central journal article supplement (PMC7982882)
Supplement: 41579_2021_535_MOESM1_ESM.pdf [file 41579_2021_535_MOESM1_ESM.pdf]

**Supplementary information**

---

**Transmissibility and transmission of  
respiratory viruses**

---

In the format provided by the  
authors and unedited

## Supplementary Information

### Transmissibility and transmission of respiratory viruses

Nancy H. L. Leung<sup>†</sup>

WHO Collaborating Centre for Infectious Disease Epidemiology and Control, School of Public Health, Li Ka Shing Faculty of Medicine, The University of Hong Kong, Hong Kong SAR, China.

<sup>†</sup>e-mail: leungnan@hku.hk

### Table of Contents

|                                                                                                                                                                              |    |
|------------------------------------------------------------------------------------------------------------------------------------------------------------------------------|----|
| <i>Supplementary Tables</i> .....                                                                                                                                            | 2  |
| <b>Supplementary Table 1. Transmissibility, modes of transmission and transmission-based precautions of common respiratory viruses in humans (unabridged version).</b> ..... | 2  |
| <b>Supplementary Table 2. Mechanistic evidence and effectiveness of common non-pharmaceutical interventions (unabridged version).</b> .....                                  | 9  |
| <i>Supplementary References</i> .....                                                                                                                                        | 11 |

## Supplementary Tables

**Supplementary Table 1. Transmissibility, modes of transmission and transmission-based precautions of common respiratory viruses in humans (unabridged version).**

| Respiratory Virus                                                  | Human coronavirus (HCoV)                                                                                                                                                                                                                                                            | Influenza virus <sup>a</sup> (IV)                                                                                                                                                                                                                                                                                                                                                                                                                    | Measles (MeV)                                                                                                                                                                       | Parainfluenza virus (PIV) | Respiratory syncytial virus (RSV)               | Human metapneumovirus (HMPV) | Varicella zoster virus (VZV)             | Rhinovirus (RuV)                                                                     | Human bocavirus <sup>b</sup> (HBov)                           | Human adenovirus <sup>c</sup> (HAdV)                                                                                             |
|--------------------------------------------------------------------|-------------------------------------------------------------------------------------------------------------------------------------------------------------------------------------------------------------------------------------------------------------------------------------|------------------------------------------------------------------------------------------------------------------------------------------------------------------------------------------------------------------------------------------------------------------------------------------------------------------------------------------------------------------------------------------------------------------------------------------------------|-------------------------------------------------------------------------------------------------------------------------------------------------------------------------------------|---------------------------|-------------------------------------------------|------------------------------|------------------------------------------|--------------------------------------------------------------------------------------|---------------------------------------------------------------|----------------------------------------------------------------------------------------------------------------------------------|
| <b>Virology</b>                                                    |                                                                                                                                                                                                                                                                                     |                                                                                                                                                                                                                                                                                                                                                                                                                                                      |                                                                                                                                                                                     |                           |                                                 |                              |                                          |                                                                                      |                                                               |                                                                                                                                  |
| <b>Family</b>                                                      | <i>Coronaviridae</i>                                                                                                                                                                                                                                                                | <i>Orthomyxoviridae</i>                                                                                                                                                                                                                                                                                                                                                                                                                              | <i>Paramyxoviridae</i>                                                                                                                                                              |                           | <i>Pneumoviridae</i>                            |                              | <i>Herpesviridae</i>                     | <i>Picornaviridae</i>                                                                | <i>Parvoviridae</i>                                           | <i>Adenoviridae</i>                                                                                                              |
| <b>Virion structure</b>                                            | Enveloped                                                                                                                                                                                                                                                                           | Enveloped                                                                                                                                                                                                                                                                                                                                                                                                                                            | Enveloped                                                                                                                                                                           |                           | Enveloped                                       |                              | Enveloped                                | Non-enveloped                                                                        | Non-enveloped                                                 | Non-enveloped                                                                                                                    |
| <b>Genomic structure</b>                                           | Positive-sense non-segmented ssRNA virus                                                                                                                                                                                                                                            | Negative-sense segmented ssRNA virus                                                                                                                                                                                                                                                                                                                                                                                                                 | Negative-sense non-segmented ssRNA virus                                                                                                                                            |                           | Negative-sense non-segmented ssRNA virus        |                              | dsDNA virus                              | Positive-sense non-segmented ssRNA virus                                             | ssDNA virus                                                   | dsDNA virus                                                                                                                      |
| <b>Common respiratory viruses from the same family<sup>d</sup></b> | Coronaviruses, including (1) novel viruses at the start of a pandemic or emerging viruses such as SARS-CoV-2, SARS-CoV and MERS-CoV, and (2) circulating endemic viruses which cause common cold such as HCoV-OC43 ( <i>Betacoronavirus 1</i> ), HCoV-229E, HCoV-NL63 and HCoV-HKU1 | Influenza viruses, including (1) novel viruses at the start of a pandemic such as the 1918 influenza A/H1N1 virus, 1957 influenza A/H2N2 virus, 1968 influenza A/H3N2 virus and 2009 influenza A/H1N1 virus, (2) circulating endemic viruses which cause seasonal influenza such as influenza A/H1N1 virus, influenza A/H3N2 virus and influenza B virus, and (3) zoonotic (avian) viruses such as influenza A/H5N1 virus and influenza A/H7N9 virus | Measles ( <i>Measles morbillivirus</i> ), parainfluenza viruses (including <i>Human respirovirus</i> & <i>Human orthorubulavirus</i> ), and mumps ( <i>Mumps orthorubulavirus</i> ) |                           | RSV ( <i>Human orthopneumovirus</i> ), and HMPV |                              | VZV ( <i>Human alphaherpes virus 3</i> ) | Rhinovirus, enterovirus, poliovirus, and coxsackievirus ( <i>Enterovirus A/B/C</i> ) | HBov1 ( <i>Primate bocaparvovirus 1</i> ), and parvovirus B19 | HAdV-B ( <i>Human mastadenovirus B</i> ), HAdV-C ( <i>Human mastadenovirus C</i> ), and HAdV-E ( <i>Human mastadenovirus E</i> ) |

Supplementary Table 1 (continued).

| Respiratory Virus                                | HCoV                                                                                                                                                                                                                                                | IV                                                                                                                                                                                                                                                                                                                                                                                                        | MeV                        | PIV                         | RSV                             | HMPV | VZV                             | RhV                         | HBov | HAdV                      |
|--------------------------------------------------|-----------------------------------------------------------------------------------------------------------------------------------------------------------------------------------------------------------------------------------------------------|-----------------------------------------------------------------------------------------------------------------------------------------------------------------------------------------------------------------------------------------------------------------------------------------------------------------------------------------------------------------------------------------------------------|----------------------------|-----------------------------|---------------------------------|------|---------------------------------|-----------------------------|------|---------------------------|
| <b>Transmissibility<sup>e</sup></b>              |                                                                                                                                                                                                                                                     |                                                                                                                                                                                                                                                                                                                                                                                                           |                            |                             |                                 |      |                                 |                             |      |                           |
| <b>Basic reproduction number (R<sub>0</sub>)</b> | SARS-CoV-2: 1.1–6.5 <sup>1-11</sup><br>SARS-CoV: 0.9–3.0 <sup>11, 12</sup><br>MERS-CoV: 0.5–8.0 <sup>11, 12</sup><br>HCoV-OC43: -<br>HCoV-229E: -<br>HCoV-NL63: -<br>HCoV-HKU1: -                                                                   | Pandemic 1918 A/H1N1: 1.0–4.3 <sup>13</sup><br>Pandemic 1957 A/H2N2: 1.4–1.7 <sup>13</sup><br>Pandemic 1968 A/H3N2: 1.1–2.1 <sup>13</sup><br>Pandemic 2009 A/H1N1: 1.1–21.0 <sup>13</sup><br>Endemic A/H1N1: 1.2–21.0 <sup>13</sup><br>Endemic A/H3N2: 1.2–1.4 <sup>13, 14</sup><br>Endemic B: 1.1 <sup>13</sup><br>Zoonotic A/H5N1: <1.0–1.1 <sup>13</sup><br>Zoonotic A/H7N9: <0.1–0.5 <sup>15-17</sup> | 1.4–770 <sup>18</sup>      | 2.3–2.7 <sup>19</sup>       | 0.9–21.9 <sup>12, 19-25</sup>   | -    | 1.2–16.9 <sup>26-30</sup>       | 1.2–2.7 <sup>12, 19</sup>   | -    | 2.3–5.1 <sup>19, 31</sup> |
| <b>Household secondary attack rate (SAR; %)</b>  | SARS-CoV-2: 3.9–38.2 <sup>32</sup><br>SARS-CoV: 0–12.3 <sup>32</sup><br>MERS-CoV: 0–9.0 <sup>32</sup><br>HCoV-OC43: 10.6–13.2 <sup>32</sup><br>HCoV-229E: 7.2–14.9 <sup>32</sup><br>HCoV-NL63: 0–12.6 <sup>32</sup><br>HCoV-HKU1: 8.6 <sup>32</sup> | Pandemic 1918 A/H1N1: -<br>Pandemic 1957 A/H2N2: 7.1–9.1 <sup>33</sup><br>Pandemic 1968 A/H3N2: 24.1 <sup>34</sup><br>Pandemic 2009 A/H1N1: 3.0–38.0 <sup>35</sup><br>Endemic A/H1N1: 17.0–33.0 <sup>36, 37</sup><br>Endemic A/H3N2: 5.7–28.0 <sup>37-40</sup><br>Endemic B: 10.5–33.0 <sup>33, 34, 37, 38</sup><br>Zoonotic A/H5N1: 5.5–29.0 <sup>41, 42</sup><br>Zoonotic A/H7N9: 1.4 <sup>17</sup>     | 52.0–84.6 <sup>43-47</sup> | 36.0–67.0 <sup>48, 49</sup> | 11.6–39.3 <sup>48, 50, 51</sup> | -    | 61.0–78.1 <sup>46, 52, 53</sup> | 28.0–58.0 <sup>54, 55</sup> | -    | -                         |

Supplementary Table 1 (continued).

| Respiratory Virus                                                                               | HCoV                                                                                                                                            | IV                                                                          | MeV             | PIV                 | RSV                 | HMPV | VZV                 | RhV                         | HBov | HAdV            |
|-------------------------------------------------------------------------------------------------|-------------------------------------------------------------------------------------------------------------------------------------------------|-----------------------------------------------------------------------------|-----------------|---------------------|---------------------|------|---------------------|-----------------------------|------|-----------------|
| <b><u>Evidence for individual modes of transmission<sup>f</sup></u></b>                         |                                                                                                                                                 |                                                                             |                 |                     |                     |      |                     |                             |      |                 |
| <b>Direct contact</b>                                                                           |                                                                                                                                                 |                                                                             |                 |                     |                     |      |                     |                             |      |                 |
| Infectious virus survival on experimentally contaminated hands <sup>g</sup>                     | SARS-CoV-2: ✓ <sup>56</sup><br>SARS-CoV: -<br>MERS-CoV: -<br>HCoV-OC43: -<br>HCoV-229E: -<br>HCoV-NL63: -<br>HCoV-HKU1: -                       | A/H1N1: ✓ <sup>56-60</sup><br>A/H3N2: ✓ <sup>57</sup><br>B: ✓ <sup>60</sup> | -               | ✓ <sup>61, 62</sup> | ✓ <sup>63</sup>     | -    | ✓ <sup>64</sup>     | ✓ <sup>61, 62, 65-67</sup>  | -    | -               |
| Virus genetic materials recovered on naturally contaminated hands                               | -                                                                                                                                               | A/H1N1: -<br>A/H3N2: -<br>B: -                                              | -               | -                   | -                   | -    | ✓ <sup>68, 69</sup> | ✓ <sup>70</sup>             | -    | -               |
| Infectious virus recovered on naturally contaminated hands                                      | -                                                                                                                                               | A/H1N1: -<br>A/H3N2: -<br>B: -                                              | -               | -                   | -                   | -    | -                   | ✓ <sup>67, 71-73</sup>      | -    | -               |
| Transfer of virus genetic materials between hands experimentally                                | -                                                                                                                                               | A/H1N1: ✓ <sup>58</sup><br>A/H3N2: -<br>B: -                                | -               | -                   | -                   | -    | -                   | -                           | -    | -               |
| Transfer of infectious virus between hands experimentally                                       | -                                                                                                                                               | A/H1N1: -<br>A/H3N2: -<br>B: -                                              | -               | -                   | ✓ <sup>63</sup>     | -    | -                   | ✓ <sup>61, 62, 66, 72</sup> | -    | -               |
| Infection initiated via exposure to infectious virus on hands demonstrated in volunteer studies | -                                                                                                                                               | -                                                                           | -               | -                   | -                   | -    | -                   | ✓ <sup>67, 74</sup>         | -    | -               |
| Transmission of laboratory-confirmed infection via hands demonstrated in observational studies  | SARS-CoV-2: ✓ <sup>75, 76</sup><br>SARS-CoV: ✓ <sup>77, 78</sup><br>MERS-CoV: -<br>HCoV-OC43: -<br>HCoV-229E: -<br>HCoV-NL63: -<br>HCoV-HKU1: - | A/H1N1: ✓ <sup>79, 80</sup><br>A/H3N2: -<br>B: -                            | ✓ <sup>81</sup> | -                   | ✓ <sup>82, 83</sup> | -    | -                   | -                           | -    | ✓ <sup>84</sup> |
| Transmission of laboratory-confirmed infection via hands demonstrated in volunteer studies      | -                                                                                                                                               | A: ✓ <sup>85</sup><br>A/H1N1: -<br>A/H3N2: -<br>B: ✓ <sup>85</sup>          | -               | -                   | -                   | -    | -                   | ✓ <sup>72, 86, 87</sup>     | -    | -               |

Supplementary Table 1 (continued).

| Respiratory Virus                                                                                         | HCoV                                                                                                                                                            | IV                                                                 | MeV   | PIV           | RSV      | HMPV  | VZV      | RhV                                 | HBov | HAdV            |
|-----------------------------------------------------------------------------------------------------------|-----------------------------------------------------------------------------------------------------------------------------------------------------------------|--------------------------------------------------------------------|-------|---------------|----------|-------|----------|-------------------------------------|------|-----------------|
| <b>Indirect contact (fomite)</b>                                                                          |                                                                                                                                                                 |                                                                    |       |               |          |       |          |                                     |      |                 |
| <b>Infectious virus survival on experimentally contaminated surfaces<sup>g</sup></b>                      | SARS-CoV-2: ✓ 56, 88-91<br>SARS-CoV: ✓ 91-94<br>MERS-CoV: ✓ 92, 95<br>HCoV-OC43: ✓ 61, 92, 96<br>HCoV-229E: ✓ 61, 92, 94, 96-99<br>HCoV-NL63: -<br>HCoV-HKU1: - | A/H1N1: ✓ 58, 60, 95, 100-104<br>A/H3N2: ✓ 104<br>B: ✓ 60, 61, 104 | -     | ✓ 61, 62, 105 | ✓ 61, 63 | ✓ 106 | ✓ 64     | ✓ 61, 67, 104, 105, 107-109         | -    | ✓ 99, 110       |
| <b>Virus genetic materials recovered on naturally contaminated surfaces</b>                               | SARS-CoV-2: ✓ 88, 111-117<br>SARS-CoV: ✓ 118-120<br>MERS-CoV: ✓ 121, 122<br>HCoV-OC43: ✓ 123, 124<br>HCoV-229E: ✓ 125<br>HCoV-NL63: -<br>HCoV-HKU1: -           | A: ✓ 123, 126<br>A/H1N1: ✓ 127<br>A/H3N2: ✓ 128<br>B: ✓ 126        | ✓ 129 | ✓ 130, 131    | -        | -     | ✓ 68, 69 | ✓ 70, 123, 132, 133                 | -    | ✓ 123, 134, 135 |
| <b>Infectious virus recovered on naturally contaminated surfaces</b>                                      | SARS-CoV-2: ✓ 116<br>SARS-CoV: -<br>MERS-CoV: ✓ 121, 122<br>HCoV-OC43: -<br>HCoV-229E: ✓ 125<br>HCoV-NL63: -<br>HCoV-HKU1: -                                    | A/H1N1: ✓ 127<br>A/H3N2: -<br>B: -                                 | -     | -             | -        | -     | -        | ✓ 72                                | -    | ✓ 134           |
| <b>Transfer of virus genetic materials between hands and surfaces experimentally</b>                      | -                                                                                                                                                               | A/H1N1: ✓ 58<br>A/H3N2: -<br>B: -                                  | -     | -             | -        | -     | -        | ✓ 70                                | -    | -               |
| <b>Transfer of infectious virus between hands and surfaces experimentally</b>                             | -                                                                                                                                                               | A/H1N1: ✓ 60, 61<br>A/H3N2: -<br>B: -                              | -     | ✓ 61, 62      | ✓ 61, 63 | -     | -        | ✓ 61, 62, 66, 67, 73, 107, 108, 136 | -    | ✓ 137           |
| <b>Infection initiated via exposure to infectious virus on surfaces demonstrated in volunteer studies</b> | -                                                                                                                                                               | -                                                                  | -     | -             | -        | -     | -        | -                                   | -    | -               |
| <b>Transmission of laboratory-confirmed infection via surfaces demonstrated in observational studies</b>  | SARS-CoV-2: ✓ 138<br>SARS-CoV: ✓ 77, 139<br>MERS-CoV: -<br>HCoV-OC43: -<br>HCoV-229E: -<br>HCoV-NL63: -<br>HCoV-HKU1: -                                         | -                                                                  | -     | -             | -        | -     | ✓ 140    | -                                   | -    | -               |
| <b>Transmission of laboratory-confirmed infection via surfaces demonstrated in volunteer studies</b>      | -                                                                                                                                                               | -                                                                  | -     | -             | ✓ 141    | -     | -        | ✓ 136                               | -    | -               |

Supplementary Table 1 (continued).

| Respiratory Virus                                                                                  | HCoV                                                                                                                                                          | IV                                                                                                                                                                        | MeV                          | PIV                             | RSV                                  | HMPV                       | VZV | RhV                               | HBov | HAdV                            |
|----------------------------------------------------------------------------------------------------|---------------------------------------------------------------------------------------------------------------------------------------------------------------|---------------------------------------------------------------------------------------------------------------------------------------------------------------------------|------------------------------|---------------------------------|--------------------------------------|----------------------------|-----|-----------------------------------|------|---------------------------------|
| <b>Droplet<sup>h</sup></b>                                                                         |                                                                                                                                                               |                                                                                                                                                                           |                              |                                 |                                      |                            |     |                                   |      |                                 |
| Infectious virus survival in experimentally generated droplets                                     | -                                                                                                                                                             | A/H1N1: ✓ <sup>142-144</sup><br>A/H3N2: ✓ <sup>142</sup><br>B: ✓ <sup>142</sup>                                                                                           | -                            | (✓) [1–5 μm] <sup>145</sup>     | -                                    | -                          | -   | -                                 | -    | -                               |
| Virus genetic materials recovered in droplets in human exhaled breath <sup>i</sup>                 | SARS-CoV-2: -<br>SARS-CoV: -<br>MERS-CoV: -<br>HCoV-OC43: (✓) [≥5 μm] <sup>146</sup><br>HCoV-229E: -<br>HCoV-NL63: -<br>HCoV-HKU1: (✓) [≥5 μm] <sup>146</sup> | Untyped: (✓) [≥7 μm] <sup>147</sup><br>A/H1N1: (✓) [≥5 μm] <sup>146, 148, 149</sup><br>A/H3N2: (✓) [≥5 μm] <sup>146, 150</sup><br>B: (✓) [≥5 μm] <sup>146, 148, 150</sup> | -                            | (✓) [≥7 μm] <sup>146, 147</sup> | (✓) [≥7 μm] <sup>147</sup>           | (✓) [≥5 μm] <sup>146</sup> | -   | (✓) [≥7 μm] <sup>147</sup>        | -    | -                               |
| Infectious virus recovered in droplets in human exhaled breath                                     | -                                                                                                                                                             | A/H1N1: (✓) [≥4 μm] <sup>149</sup><br>A/H3N2: -<br>B: -                                                                                                                   | -                            | -                               | -                                    | -                          | -   | -                                 | -    | -                               |
| Virus genetic materials recovered in droplets in the air                                           | SARS-CoV-2: (✓) [≥4 μm] <sup>111</sup><br>SARS-CoV: -<br>MERS-CoV: -<br>HCoV-OC43: -<br>HCoV-229E: -<br>HCoV-NL63: -<br>HCoV-HKU1: -                          | Untyped: (✓) [≥4.7 μm] <sup>151, 152</sup><br>A: (✓) [≥4 μm] <sup>153-157</sup><br>A/H1N1: (✓) [≥4 μm] <sup>127</sup><br>A/H3N2: -<br>B: (✓) [≥4 μm] <sup>154</sup>       | (✓) [≥4.7 μm] <sup>129</sup> | -                               | (✓) [≥4 μm] <sup>156, 158, 159</sup> | -                          | -   | (✓) [≥4 μm] <sup>151, 154</sup>   | -    | (✓) [≥4 μm] <sup>158, 160</sup> |
| Infectious virus recovered in droplets in the air                                                  | -                                                                                                                                                             | -                                                                                                                                                                         | -                            | -                               | (✓) [≥7 μm] <sup>161</sup>           | -                          | -   | -                                 | -    | -                               |
| Infection initiated via exposure to infectious virus in droplets demonstrated in volunteer studies | SARS-CoV-2: -<br>SARS-CoV: -<br>MERS-CoV: -<br>HCoV-OC43: -<br>HCoV-229E: ✓ <sup>162-164</sup><br>HCoV-NL63: -<br>HCoV-HKU1: -                                | A/H1N1: ✓ <sup>165-167</sup><br>A/H3N2: ✓ <sup>168-173</sup><br>B: ✓ <sup>167</sup>                                                                                       | -                            | -                               | ✓ <sup>163, 174-177</sup>            | ✓ <sup>178</sup>           | -   | ✓ <sup>67, 72, 163, 179-183</sup> | -    | (✓) [15 μm] <sup>183, 184</sup> |
| Transmission of laboratory-confirmed infection via droplets demonstrated in observational studies  | -                                                                                                                                                             | -                                                                                                                                                                         | -                            | -                               | -                                    | -                          | -   | -                                 | -    | -                               |
| Transmission of laboratory-confirmed infection via droplets demonstrated in volunteer studies      | -                                                                                                                                                             | -                                                                                                                                                                         | -                            | -                               | -                                    | -                          | -   | -                                 | -    | -                               |

Supplementary Table 1 (continued).

| Respiratory Virus                                                                                         | HCoV                                                                                                                                        | IV                                                                                                                        | MeV        | PIV        | RSV                  | HMPV  | VZV       | RhV       | HBov | HAdV                 |
|-----------------------------------------------------------------------------------------------------------|---------------------------------------------------------------------------------------------------------------------------------------------|---------------------------------------------------------------------------------------------------------------------------|------------|------------|----------------------|-------|-----------|-----------|------|----------------------|
| <b>Aerosol<sup>h</sup></b>                                                                                |                                                                                                                                             |                                                                                                                           |            |            |                      |       |           |           |      |                      |
| <b>Infectious virus survival in experimentally generated aerosols</b>                                     | SARS-CoV-2: ✓ 91, 185-187<br>SARS-CoV: ✓ 91, 185<br>MERS-CoV: ✓ 95, 185<br>HCoV-OC43: -<br>HCoV-229E: ✓ 188<br>HCoV-NL63: -<br>HCoV-HKU1: - | A/H1N1: ✓ 95, 143, 144<br>A/H3N2: ✓ 142, 189<br>B: ✓ 142                                                                  | ✓ 190      | ✓ 145, 191 | ✓ 192, 193           | -     | -         | -         | -    | ✓ 191, 194           |
| <b>Virus genetic materials recovered in aerosols in human exhaled breath<sup>i</sup></b>                  | SARS-CoV-2: -<br>SARS-CoV: -<br>MERS-CoV: -<br>HCoV-OC43: ✓ 146<br>HCoV-229E: -<br>HCoV-NL63: ✓ 146<br>HCoV-HKU1: ✓ 146                     | A/H1N1: ✓ 146, 148, 149<br>A/H3N2: ✓ 146, 150<br>B: ✓ 146, 148, 150                                                       | -          | ✓ 146, 147 | ✓ 146                | ✓ 146 | -         | ✓ 147     | -    | -                    |
| <b>Infectious virus recovered in aerosols in human exhaled breath</b>                                     | -                                                                                                                                           | A/H1N1: ✓ 148<br>A/H3N2: ✓ 146, 150, 195<br>B: ✓ 146                                                                      | -          | -          | -                    | -     | -         | -         | -    | -                    |
| <b>Virus genetic materials recovered in aerosols in the air</b>                                           | SARS-CoV-2: ✓ 111, 116, 196<br>SARS-CoV: -<br>MERS-CoV: ✓ 122<br>HCoV-OC43: -<br>HCoV-229E: ✓ 197<br>HCoV-NL63: -<br>HCoV-HKU1: ✓ 197       | Untyped: ✓ 151, 152<br>A: ✓ 124, 153-157, 198, 199<br>A/H1N1: ✓ 127, 197<br>A/H3N2: ✓ 197, 198<br>B: ✓ 124, 153, 154, 197 | ✓ 129      | ✓ 197      | ✓ 156, 158, 197, 200 | -     | ✓ 201     | ✓ 151     | -    | ✓ 158, 160, 197, 199 |
| <b>Infectious virus recovered in aerosols in the air</b>                                                  | SARS-CoV-2: ✓ 116, 202<br>SARS-CoV: -<br>MERS-CoV: ✓ 122<br>HCoV-OC43: -<br>HCoV-229E: -<br>HCoV-NL63: -<br>HCoV-HKU1: -                    | A: ✓ 154<br>A/H1N1: ✓ 197<br>A/H3N2: ✓ 197<br>B: ✓ 154, 197                                                               | -          | -          | ✓ 161, 197           | -     | -         | -         | -    | -                    |
| <b>Infection initiated via exposure to infectious virus in aerosols demonstrated in volunteer studies</b> | -                                                                                                                                           | A: ✓ 203<br>A/H1N1: ✓ 167<br>A/H3N2: -<br>B: ✓ 167                                                                        | -          | -          | -                    | -     | -         | ✓ 183     | -    | ✓ 183, 184, 204      |
| <b>Transmission of laboratory-confirmed infection via aerosols demonstrated in observational studies</b>  | SARS-CoV-2: ✓ 205, 206<br>SARS-CoV: ✓ 207, 208<br>MERS-CoV: ✓ 209, 210<br>HCoV-OC43: -<br>HCoV-229E: -<br>HCoV-NL63: -<br>HCoV-HKU1: -      | A/H1N1: ✓ 80<br>A/H3N2: ✓ 211, 212<br>B: -                                                                                | ✓ 213, 214 | -          | -                    | -     | ✓ 215-218 | -         | -    | -                    |
| <b>Transmission of laboratory-confirmed infection via aerosols demonstrated in volunteer studies</b>      | -                                                                                                                                           | -                                                                                                                         | ✓ 219      | -          | -                    | -     | ✓ 219     | ✓ 71, 183 | -    | -                    |



Supplementary Table 1 (continued).

| Respiratory Virus                                                        | HCoV                                                                                                                                                     | IV                                                                                                                  | MeV                   | PIV              | RSV              | HMPV             | VZV                   | RhV              | HBov | HAdV             |
|--------------------------------------------------------------------------|----------------------------------------------------------------------------------------------------------------------------------------------------------|---------------------------------------------------------------------------------------------------------------------|-----------------------|------------------|------------------|------------------|-----------------------|------------------|------|------------------|
| <b>Transmission-based precautions in healthcare settings<sup>j</sup></b> |                                                                                                                                                          |                                                                                                                     |                       |                  |                  |                  |                       |                  |      |                  |
| <b>Contact precautions</b>                                               | SARS-CoV-2: Y <sup>220</sup><br>SARS-CoV: Y <sup>221</sup><br>MERS-CoV: Y <sup>222</sup><br>HCoV-OC43: -<br>HCoV-229E: -<br>HCoV-NL63: -<br>HCoV-HKU1: - | Pandemic influenza: N <sup>221</sup><br>Endemic influenza: N <sup>221</sup><br>Zoonotic influenza: Y <sup>221</sup> | N <sup>221, 223</sup> | Y <sup>221</sup> | Y <sup>221</sup> | Y <sup>221</sup> | N <sup>221, 224</sup> | Y <sup>221</sup> | -    | Y <sup>221</sup> |
| <b>Droplet precautions</b>                                               | SARS-CoV-2: Y <sup>220</sup><br>SARS-CoV: Y <sup>221</sup><br>MERS-CoV: Y <sup>222</sup><br>HCoV-OC43: -<br>HCoV-229E: -<br>HCoV-NL63: -<br>HCoV-HKU1: - | Pandemic influenza: Y <sup>221</sup><br>Endemic influenza: Y <sup>221</sup><br>Zoonotic influenza: Y <sup>221</sup> | N <sup>221, 223</sup> | Y <sup>221</sup> | Y <sup>221</sup> | Y <sup>221</sup> | N <sup>221, 224</sup> | Y <sup>221</sup> | -    | Y <sup>221</sup> |
| <b>Airborne precautions</b>                                              | SARS-CoV-2: N <sup>220</sup><br>SARS-CoV: N <sup>221</sup><br>MERS-CoV: N <sup>222</sup><br>HCoV-OC43: -<br>HCoV-229E: -<br>HCoV-NL63: -<br>HCoV-HKU1: - | Pandemic influenza: N <sup>221</sup><br>Endemic influenza: N <sup>221</sup><br>Zoonotic influenza: N <sup>221</sup> | Y <sup>221, 223</sup> | N <sup>221</sup> | N <sup>221</sup> | N <sup>221</sup> | Y <sup>221, 224</sup> | N <sup>221</sup> | -    | N <sup>221</sup> |

<sup>a</sup>Evidence on transmissibility and transmission-based precautions in healthcare settings is stratified by pandemic, endemic and zoonotic influenza viruses. Pandemic (influenza) virus refers to novel influenza virus that first appears in the population, whereas endemic (influenza) virus refers to influenza virus that has been circulating in the population. For example, influenza A/H1N1pdm09 virus circulated in 2009 is referred to as 'pandemic 2009 A/H1N1', while when circulated in later years (such as in 2011) it is referred to as 'endemic A/H1N1'. Zoonotic (influenza) virus refers to influenza virus that normally circulates in animals but occasionally causes infection in humans with limited human-to-human transmission. Evidence for individual modes of transmission is stratified by influenza virus types (influenza A virus or influenza B virus) and influenza A virus subtypes (influenza A/H1N1 virus or influenza A/H3N2 virus) where possible.

<sup>b</sup>There is a lack of evidence on all modes of transmission for human bocavirus.

<sup>c</sup>HAdV types that are considered mainly respiratory (but not enteric) are included.

<sup>d</sup>Species names of common respiratory viruses belonging to the same virus family are provided in parentheses.

<sup>e</sup>Range of reported estimates of the mean or median are provided. Estimates of household SAR in the absence of interventions were extracted where possible.

<sup>f</sup>Observational studies include epidemiological or outbreak investigations, whereas volunteer studies include challenge studies or randomized (controlled) trials.

<sup>g</sup>Data includes contamination by direct virus inoculation or contamination by volunteers who were experimentally infected.

<sup>h</sup>Particles with aerodynamic diameter larger than 5 µm are traditionally defined as droplets whereas those smaller are defined as aerosols. However, there is ongoing discussion on redefining the particle size threshold between droplets and aerosols (refer to the section 'Terminology and defining features of modes of transmission' in the main text). Therefore, for evidence on droplet transmission, evidence is provided in parentheses if evidence of virus recovery is only identified in particles with aerodynamic diameter between 5–100 µm. Air samples collected without size fractionation but were collected over 2 meters from a known source (for example, an infected individual) are considered as evidence suggestive of aerosols.

<sup>i</sup>Evidence for virus genetic materials recovered in droplets or aerosols in human exhaled breath for IV types/ subtypes, PIV, RSV and HMPV is based on the author's own additional data of the published study<sup>146</sup>.

<sup>j</sup>Each precautions represents a set of infection prevention and control practices and personal protective equipment recommended by the WHO for healthcare workers during routine patient care (excluding aerosol-generating procedures) within healthcare facilities, with consideration of the current understanding on the modes of transmission of the respective pathogen. These transmission-based precautions are to be applied in addition to Standard precautions, which is always applied in all healthcare settings for all patients.

✓, evidence identified; (✓), evidence identified only in particles with aerodynamic diameter between 5–100 µm (applicable to droplet transmission only); -, evidence not found; Y, recommended; N, not recommended; HCoV, human coronavirus; IV, influenza virus; MeV, measles virus; PIV, parainfluenza virus; RSV, respiratory syncytial virus; HMPV, human metapneumovirus; VZV, varicella zoster virus; RhV, rhinovirus; HAdV, human adenovirus

**Supplementary Table 2. Mechanistic evidence and effectiveness of common non-pharmaceutical interventions (unabridged version).**

| NPI                                     | Targeted MoT <sup>a</sup> | Mechanism of action                                                                                                                                                                                                                                                                                                                                                                                                                                                                                                                                                                                                             | Mechanistic evidence                                                                                                                                                                                                                                                                                                                                                                                                                                                                                                                                                                                                                                                                                                                                                                                                                                                                                                                                                                                                                                                | Effectiveness <sup>b</sup>                                                                                                                                                                                                                                                                                                                                                                                                                                                                                                                                                                                                                                                                                                                                                                                                                              |
|-----------------------------------------|---------------------------|---------------------------------------------------------------------------------------------------------------------------------------------------------------------------------------------------------------------------------------------------------------------------------------------------------------------------------------------------------------------------------------------------------------------------------------------------------------------------------------------------------------------------------------------------------------------------------------------------------------------------------|---------------------------------------------------------------------------------------------------------------------------------------------------------------------------------------------------------------------------------------------------------------------------------------------------------------------------------------------------------------------------------------------------------------------------------------------------------------------------------------------------------------------------------------------------------------------------------------------------------------------------------------------------------------------------------------------------------------------------------------------------------------------------------------------------------------------------------------------------------------------------------------------------------------------------------------------------------------------------------------------------------------------------------------------------------------------|---------------------------------------------------------------------------------------------------------------------------------------------------------------------------------------------------------------------------------------------------------------------------------------------------------------------------------------------------------------------------------------------------------------------------------------------------------------------------------------------------------------------------------------------------------------------------------------------------------------------------------------------------------------------------------------------------------------------------------------------------------------------------------------------------------------------------------------------------------|
| PPE and hygienic practice               | Hand hygiene              | <ul style="list-style-type: none"> <li>- <i>Soaps</i> remove organic substances by detergent properties<sup>225</sup>.</li> <li>- <i>Alcohol</i> denatures proteins in the presence of water<sup>225</sup>.</li> </ul>                                                                                                                                                                                                                                                                                                                                                                                                          | <ul style="list-style-type: none"> <li>- <i>Alcohol</i> had higher viricidal activity on enveloped than non-enveloped viruses<sup>225</sup> e.g. inactivating coronaviruses in 30 seconds<sup>226-228</sup>, although reduce viability by &gt;1,000-fold on artificially inoculated hands when for adenovirus and rhinovirus<sup>229</sup>.</li> <li>- <i>Alcohol-based hand sanitizers</i> more efficacious than <i>plain soaps</i> on pathogen inactivation <i>in vivo</i>, although mostly based on evidence of bactericidal and less on viricidal activity<sup>230</sup>.</li> </ul>                                                                                                                                                                                                                                                                                                                                                                                                                                                                            | <ul style="list-style-type: none"> <li>- Multiple systematic reviews suggested <i>hand hygiene</i> alone significantly associated with reduced respiratory illness but not influenza virus infection in community settings<sup>79, 231-233</sup>, perhaps due to insufficient compliance<sup>234, 235</sup>.</li> <li>- Studies on the effectiveness of <i>hand hygiene</i> on respiratory virus transmission in healthcare settings were not identified.</li> <li>- Insufficient studies to compare the efficacies of <i>plain soaps</i> versus <i>alcohol-based hand sanitizers</i> against respiratory infections<sup>231, 233</sup>.</li> </ul>                                                                                                                                                                                                     |
|                                         | Face coverings            | <ul style="list-style-type: none"> <li>- <i>Face coverings as source control</i>: When worn by an infected individual, reduce virus release to the environment by <i>filtration</i><sup>146</sup> and immediate virus exposure of nearby healthy individuals by <i>deflection</i><sup>236</sup>.</li> <li>- <i>Face coverings as protection</i>: When worn by a healthy individual, reduce exposure to virus-laden droplets and aerosols in the air. (- Might also reduce virus transfer for contact transmission by reducing the frequency of hands touching respiratory mucosa<sup>237</sup>.)</li> </ul>                     | <ul style="list-style-type: none"> <li>- As <i>source control, surgical masks</i> efficaciously reduced influenza virus and coronavirus release from patients by <i>filtration</i><sup>146, 148</sup>; efficacies on exhaled droplets and aerosols may vary between viruses<sup>146</sup>. Studies using mannequins suggested <i>deflection</i> also important in reducing virus release<sup>236</sup>.</li> <li>- As <i>protection against close-range transmission, cloth masks</i><sup>238</sup>, <i>surgical masks</i><sup>239</sup> and <i>respirators</i><sup>240, 241</sup> efficacious by filtration against artificial bacteriophage<sup>238</sup> or influenza aerosols<sup>239-241</sup> challenge.</li> <li>- As <i>protection against long-range transmission</i>, in the absence of environmental air flow only 1% of radiolabeled saline aerosols generated from the source mannequin reached the exposed mannequin 3 feet apart, where only fitted <i>respirators</i> but not surgical masks reduced exposure to aerosols<sup>236</sup>.</li> </ul> | <ul style="list-style-type: none"> <li>- Multiple systematic reviews of observational studies<sup>242, 243</sup> or randomized trials<sup>243-245</sup> mostly suggested the use of <i>face coverings</i> alone, or in combination with other NPIs, effective in reducing risk of respiratory illness or virus transmission in healthcare<sup>242, 243</sup> and high-risk community settings<sup>245</sup>, while others do not<sup>244</sup>.</li> <li>- Low compliance to <i>face shield</i> during high-risk procedures associated with higher risk of respiratory illnesses in healthcare workers<sup>246</sup>.</li> <li>- <i>Face mask</i> use by household members before the primary case developed symptoms significantly associated with reduced SARS-CoV-2 household transmission in a retrospective cohort study<sup>138</sup>.</li> </ul> |
| Environmental disinfection and dilution | Surface cleaning          | <ul style="list-style-type: none"> <li>- Common <i>disinfectants used in healthcare settings</i> include 0.1 mol/L sodium hydroxide, 70% ethanol, 70% 1-propanol, ethylene oxide and sodium hypochlorite<sup>92, 247</sup>.</li> <li>- Common <i>household cleaning agents</i> include liquid soap, 1% bleach, and antimicrobial or antiviral wipes<sup>248, 249</sup>.</li> <li>- Both disinfect contaminated surfaces by virus inactivation. (- Might also reduce droplet or aerosol transmission by reducing fomites available for resuspension during activities such as walking or door opening<sup>250</sup>.)</li> </ul> | <ul style="list-style-type: none"> <li>- Common <i>disinfectants used in healthcare settings</i> effectively inactivated influenza virus<sup>247</sup> and coronaviruses<sup>92</sup> on surfaces within 1 minute in experimental settings.</li> <li>- Common <i>household cleaning agents</i> effectively inactivated (enveloped) influenza virus<sup>248, 249</sup>, but less effective for (non-enveloped) adenovirus<sup>249</sup> in experimental settings.</li> <li>- <i>Biweekly disinfection of toys</i> significantly reduced adenovirus, rhinovirus and RSV, but not coronaviruses, parainfluenza virus and bocavirus, in the environment of daycare nurseries in a randomized trial<sup>251</sup>.</li> </ul>                                                                                                                                                                                                                                                                                                                                            | <ul style="list-style-type: none"> <li>- A systematic review found limited epidemiologic studies on effectiveness of <i>surface and object cleaning</i> in reducing community respiratory virus transmission during pandemics<sup>232</sup>.</li> <li>- <i>Biweekly disinfection of toys</i> in daycare nurseries did not reduce respiratory illness in a randomized trial<sup>251</sup>.</li> <li>- The combined use of <i>alcohol-based hand sanitizer</i> and <i>chloride wipes</i>, compared to <i>hand washing</i>, reduced gastrointestinal but not respiratory illness in elementary school students in a randomized trial<sup>252</sup>.</li> <li>- <i>Daily household cleaning</i> with disinfectants significantly associated with reduced household transmission of SARS-CoV-2<sup>138</sup>.</li> </ul>                                     |

Supplementary Table 2 (continued).

| Environmental disinfection and dilution (cont'd)                          |                    |                                                                                                                                                                                                                                                                                                                                                                                                                                                                                                                                                                                                                                                                                                                                                                                                                                                                                                                                                                                                                                                                           |                                                                                                                                                                                                                                                                                                                                                                                                                                                                                                                                                                                                                                                                                                                                                                                                                                                                                                                    |
|---------------------------------------------------------------------------|--------------------|---------------------------------------------------------------------------------------------------------------------------------------------------------------------------------------------------------------------------------------------------------------------------------------------------------------------------------------------------------------------------------------------------------------------------------------------------------------------------------------------------------------------------------------------------------------------------------------------------------------------------------------------------------------------------------------------------------------------------------------------------------------------------------------------------------------------------------------------------------------------------------------------------------------------------------------------------------------------------------------------------------------------------------------------------------------------------|--------------------------------------------------------------------------------------------------------------------------------------------------------------------------------------------------------------------------------------------------------------------------------------------------------------------------------------------------------------------------------------------------------------------------------------------------------------------------------------------------------------------------------------------------------------------------------------------------------------------------------------------------------------------------------------------------------------------------------------------------------------------------------------------------------------------------------------------------------------------------------------------------------------------|
| Air and surface disinfection by ultraviolet germicidal irradiation (UVGI) | - Aerosol, Contact | <p>- <b>UVGI</b> is the use of UV light in the germicidal range (200–320 nm), especially UV-C (200–280 nm), for air and surface disinfection against bacteria<sup>263</sup> or viruses by nucleic acid cross-linking<sup>264</sup>.</p> <p>- <b>Air disinfection</b>: in <b>upper-room UVGI</b>, irradiation confined to room area above room occupants' heads to minimize direct exposure, but requires good vertical air movement in the room. In <b>induct UVGI</b>, air passing through ventilation systems is irradiated inside the ducts inaccessible to occupants before recirculation or exhaustion<sup>265</sup>.</p> <p>- <b>Surface disinfection</b>: UVGI used on internal surfaces of ventilation systems, or surfaces and equipment in healthcare settings<sup>264</sup>, originally for bacterial decontamination<sup>266</sup> but may also be useful for viral decontamination.</p>                                                                                                                                                                      | <p>- <b>UV-C</b> efficiently inactivated experimentally generated aerosols containing influenza virus<sup>267</sup> or coronaviruses<sup>268</sup>, but less effective for adenovirus<sup>194</sup>.</p> <p>- At higher relative humidity, increased susceptibility to <b>UV-C</b> observed for experimentally generated aerosols containing adenovirus<sup>194</sup>, but decreased for influenza virus<sup>267</sup> and vaccinia virus<sup>269</sup>.</p> <p>- A 5-minute exposure to <b>UV-C</b> efficiently inactivated experimentally generated MERS-CoV on glass slides by a million-fold reduction to undetectable level<sup>270</sup>.</p> <p>- <b>Upper-room UVGI</b> efficiently reduced infectious vaccinia virus aerosols in a simulated hospital room<sup>271</sup>.</p> <p>- <b>UVGI</b> significantly inactivated experimentally inoculated influenza virus on respirators<sup>272, 273</sup>.</p> |
| Air dilution by ventilation and directional airflow                       | - Droplet, Aerosol | <p>- <b>Ventilation</b> is the intentional introduction of outdoor air into a building, measured as <b>ventilation rate</b> as amount of outdoor air introduced per interior space volume (air changes per hour [ACH, h<sup>-1</sup>]), or per occupant in the space (outdoor air rate per person [L s<sup>-1</sup> person<sup>-1</sup>]). <b>Mechanical ventilation</b> achieved via fans, ductwork or other Heating, Ventilation and Air-Conditioning (HVAC) systems; while <b>natural ventilation</b> achieved by manually opening windows or doors to allow indoor airflow via difference in wind and thermal pressure<sup>253</sup>.</p> <p>- <b>Directional airflow</b> provides clean air from the cleanest to less clean patient care areas, e.g. introducing air at the ceiling and exhausting near the floor, or via laminar airflow.</p>                                                                                                                                                                                                                       | <p>- Lower <b>ventilation</b> associated with rhinovirus RNA detection in the air in office environment in an observational study<sup>254</sup>.</p>                                                                                                                                                                                                                                                                                                                                                                                                                                                                                                                                                                                                                                                                                                                                                               |
|                                                                           |                    | <p>- Multiple systematic reviews suggested strong and sufficient evidence supporting the association between <b>indoor ventilation</b> and <b>airflow patterns</b> with transmission of SARS, influenza, measles and chickenpox<sup>255, 256</sup>, although not yet validated by intervention studies or randomized trials<sup>257</sup>.</p> <p>- <b>Directional airflow</b> may reduce the risk of airborne infection in vulnerable patients or nosocomial transmission in healthcare settings<sup>258, 259</sup>, and also in community settings e.g. aircraft cabins<sup>260</sup>.</p> <p>- Some hypothesized increasing indoor <b>mechanical ventilation</b> may be less effective or cost-effective to achieve sufficient risk reduction in crowded indoor areas given high level of exposure<sup>261</sup>, or might increase aerosol dispersion and infection risk for individuals further away from the source<sup>260</sup>; <b>directional airflow</b> may therefore play a more important role than ventilation in reducing transmission<sup>262</sup>.</p> |                                                                                                                                                                                                                                                                                                                                                                                                                                                                                                                                                                                                                                                                                                                                                                                                                                                                                                                    |

<sup>a</sup>Mode(s) of transmission listed in parentheses indicate possible but presumably less importance via that mode.

<sup>b</sup>Effectiveness on respiratory illness or virus transmission.

NPI, non-pharmaceutical intervention; MoT, mode of transmission; PPE, personal protective equipment; UV, ultraviolet; UVGI, ultraviolet germicidal irradiation

## Supplementary References

1. Bae, S. et al. Epidemiological Characteristics of COVID-19 Outbreak at Fitness Centers in Cheonan, Korea. *J. Korean Med. Sci.* **35** (2020).
2. D'Arienzo, M. & Coniglio, A. Assessment of the SARS-CoV-2 basic reproduction number,  $R_0$ , based on the early phase of COVID-19 outbreak in Italy. *Biosaf. Health* **2**, 57-59 (2020).
3. Hao, X. et al. Reconstruction of the full transmission dynamics of COVID-19 in Wuhan. *Nature* **584**, 420-424 (2020).
4. He, W., Yi, G.Y. & Zhu, Y. Estimation of the basic reproduction number, average incubation time, asymptomatic infection rate, and case fatality rate for COVID-19: Meta-analysis and sensitivity analysis. *J. Med. Virol.* (2020).
5. Kim, S. et al. Evaluation of COVID-19 epidemic outbreak caused by temporal contact-increase in South Korea. *Int. J. Infect. Dis.* **96**, 454-457 (2020).
6. Lv, M. et al. Coronavirus disease (COVID-19): a scoping review. *Euro Surveill.* **25** (2020).
7. Nadim, S.S. & Chattopadhyay, J. Occurrence of backward bifurcation and prediction of disease transmission with imperfect lockdown: A case study on COVID-19. *Chaos, Solitons & Fractals* **140**, 110163 (2020).
8. Park, M., Cook, A.R., Lim, J.T., Sun, Y. & Dickens, B.L. A Systematic Review of COVID-19 Epidemiology Based on Current Evidence. *J Clin. Med.* **9** (2020).
9. Rahman, B., Sadraddin, E. & Porreca, A. The basic reproduction number of SARS - CoV - 2 in Wuhan is about to die out, how about the rest of the World? *Rev. Med. Virol.* **30** (2020).
10. Wang, X. et al. Basic epidemiological parameter values from data of real-world in mega-cities: the characteristics of COVID-19 in Beijing, China. *BMC Infect. Dis.* **20**, 526 (2020).
11. Wu, J.T., Leung, K. & Leung, G.M. Nowcasting and forecasting the potential domestic and international spread of the 2019-nCoV outbreak originating in Wuhan, China: a modelling study. *Lancet* (2020).
12. Spencer, J. et al. Epidemiological parameter review and comparative dynamics of influenza, respiratory syncytial virus, rhinovirus, human coronavirus, and adenovirus. Preprint at <https://www.medrxiv.org/content/10.1101/2020.02.04.20020404v1> (2020).
13. Biggerstaff, M., Cauchemez, S., Reed, C., Gambhir, M. & Finelli, L. Estimates of the reproduction number for seasonal, pandemic, and zoonotic influenza: a systematic review of the literature. *BMC Infect. Dis.* **14**, 480 (2014).
14. Smieszek, T. et al. Reconstructing the 2003/2004 H3N2 influenza epidemic in Switzerland with a spatially explicit, individual-based model. *BMC Infect. Dis.* **11**, 115 (2011).
15. Chong, K.C. et al. Interpreting the transmissibility of the avian influenza A(H7N9) infection from 2013 to 2015 in Zhejiang Province, China. *Epidemiol. Infect.* **144**, 1584-91 (2016).
16. Kucharski, A.J., Mills, H.L., Donnelly, C.A. & Riley, S. Transmission Potential of Influenza A(H7N9) Virus, China, 2013-2014. *Emerg. Infect. Dis.* **21**, 852-5 (2015).
17. Yang, Y. et al. Household transmissibility of avian influenza A (H7N9) virus, China, February to May 2013 and October 2013 to March 2014. *Euro Surveill.* **20**, 21056 (2015).
18. Guerra, F.M. et al. The basic reproduction number ( $R_0$ ) of measles: a systematic review. *Lancet Infect. Dis.* **17**, e420-e428 (2017).
19. Reis, J. & Shaman, J. Simulation of four respiratory viruses and inference of epidemiological parameters. *Infect. Dis. Model.* **3**, 23-34 (2018).
20. van Boven, M. et al. Estimating Transmission Parameters for Respiratory Syncytial Virus and Predicting the Impact of Maternal and Pediatric Vaccination. *J. Infect. Dis.* (2020).
21. Otomaru, H. et al. Transmission of Respiratory Syncytial Virus Among Children Under 5 Years in Households of Rural Communities, the Philippines. *Open Forum Infect. Dis.* **6** (2019).

22. Hogan, A.B., Glass, K., Moore, H.C. & Anderssen, R.S. Exploring the dynamics of respiratory syncytial virus (RSV) transmission in children. *Theor. Popul. Biol.* **110**, 78-85 (2016).
23. Duvvuri, V.R. et al. Genetic diversity and evolutionary insights of respiratory syncytial virus A ON1 genotype: global and local transmission dynamics. *Sci. Rep.* **5**, 14268 (2015).
24. White, L.J. et al. Understanding the transmission dynamics of respiratory syncytial virus using multiple time series and nested models. *Math. Biosci.* **209**, 222-239 (2007).
25. Weber, A., Weber, M. & Milligan, P. Modeling epidemics caused by respiratory syncytial virus (RSV). *Math. Biosci.* **172**, 95-113 (2001).
26. Medić, S. et al. Varicella zoster virus transmission dynamics in Vojvodina, Serbia. *PLoS One* **13**, e0193838 (2018).
27. Marangi, L. et al. The natural history of varicella zoster virus infection in Norway: Further insights on exogenous boosting and progressive immunity to herpes zoster. *PLoS One* **12**, e0176845 (2017).
28. Santermans, E. et al. The social contact hypothesis under the assumption of endemic equilibrium: Elucidating the transmission potential of VZV in Europe. *Epidemics* **11**, 14-23 (2015).
29. Farrington, C.P., Unkel, S. & Anaya-Izquierdo, K. Estimation of basic reproduction numbers: individual heterogeneity and robustness to perturbation of the contact function. *Biostatistics* **14**, 528-40 (2013).
30. Nardone, A. et al. The comparative sero-epidemiology of varicella zoster virus in 11 countries in the European region. *Vaccine* **25**, 7866-72 (2007).
31. Guo, Z. et al. Epidemiological analysis of an outbreak of an adenovirus type 7 infection in a boot camp in China. *PLoS One* **15**, e0232948 (2020).
32. Madewell, Z.J., Yang, Y., Longini, I.M., Jr., Halloran, M.E. & Dean, N.E. Household Transmission of SARS-CoV-2: A Systematic Review and Meta-analysis. *JAMA Netw Open* **3**, e2031756 (2020).
33. Nishiura, H. & Chowell, G. Household and community transmission of the Asian influenza A (H2N2) and influenza B viruses in 1957 and 1961. *Southeast Asian J. Trop. Med. Public Health* **38**, 1075-83 (2007).
34. Hall, C.E., Cooney, M.K. & Fox, J.P. The Seattle virus watch. IV. Comparative epidemiologic observations of infections with influenza A and B viruses, 1965-1969, in families with young children. *Am. J. Epidemiol.* **98**, 365-80 (1973).
35. Lau, L.L. et al. Household transmission of 2009 pandemic influenza A (H1N1): a systematic review and meta-analysis. *Epidemiology* **23**, 531-42 (2012).
36. Ng, S. et al. Association between Haemagglutination inhibiting antibodies and protection against clade 6B viruses in 2013 and 2015. *Vaccine* (2017).
37. Longini, I.M., Jr., Koopman, J.S., Monto, A.S. & Fox, J.P. Estimating household and community transmission parameters for influenza. *Am. J. Epidemiol.* **115**, 736-51 (1982).
38. Azman, A.S. et al. Household transmission of influenza A and B in a school-based study of non-pharmaceutical interventions. *Epidemics* **5**, 181-6 (2013).
39. Nukiwa-Souma, N. et al. Influenza Transmission in a Community during a Seasonal Influenza A(H3N2) Outbreak (2010-2011) in Mongolia: A Community-Based Prospective Cohort Study. *PLoS One* **7**, e33046 (2012).
40. Longini, I.M., Jr. & Monto, A.S. Efficacy of virucidal nasal tissues in interrupting familial transmission of respiratory agents. A field trial in Tecumseh, Michigan. *Am. J. Epidemiol.* **128**, 639-44 (1988).
41. Aditama, T.Y. et al. Avian Influenza H5N1 Transmission in Households, Indonesia. *PLoS One* **7**, e29971 (2012).
42. Yang, Y., Halloran, M.E., Sugimoto, J.D. & Longini, I.M., Jr. Detecting human-to-human transmission of avian influenza A (H5N1). *Emerg. Infect. Dis.* **13**, 1348-53 (2007).

43. Marin, M. et al. Measles transmission and vaccine effectiveness during a large outbreak on a densely populated island: implications for vaccination policy. *Clin. Infect. Dis.* **42**, 315-9 (2006).
44. Arenz, S., Schmitt, H.-J., Tischer, A. & von Kries, R.d. Effectiveness of Measles Vaccination After Household Exposure During a Measles Outbreak. *Pediatr. Infect. Dis. J.* **24**, 697-699 (2005).
45. Narain, J.P., Khare, S., Rana, S.R. & Banerjee, K.B. Epidemic measles in an isolated unvaccinated population, India. *Int. J. Epidemiol.* **18**, 952-8 (1989).
46. Simpson, R.E. Infectiousness of communicable diseases in the household (measles, chickenpox, and mumps). *Lancet* **2**, 549-54 (1952).
47. Top, F.H. Measles in Detroit, 1935 —I, Factors Influencing the Secondary Attack Rate Among Susceptibles at Risk. *Am. J. Public Health Nations Health* **28**, 935-943 (1938).
48. Cooney, M.K., Fox, J.P. & Hall, C.E. The Seattle Virus Watch. VI. Observations of infections with and illness due to parainfluenza, mumps and respiratory syncytial viruses and *Mycoplasma pneumoniae*. *Am. J. Epidemiol.* **101**, 532-51 (1975).
49. Banatvala, J.E., Anderson, T.B. & Reiss, B.B. Parainfluenza Infections in the Community. *BMJ* **1**, 537-40 (1964).
50. Hall, C.B. et al. Respiratory Syncytial Virus Infections within Families. *N. Engl. J. Med.* **294**, 414-419 (1976).
51. Monto, A.S. & Lim, S.K. The Tecumseh study of respiratory illness. III. Incidence and periodicity of respiratory syncytial virus and *Mycoplasma pneumoniae* infections. *Am. J. Epidemiol.* **94**, 290-301 (1971).
52. Ceyhan, M., Tezer, H. & Yildirim, I. Secondary attack rate of hepatitis A, varicella and mumps in household settings and reliability of family history to detect seronegative children for necessity of vaccination. *Scand. J. Infect. Dis.* **41**, 501-506 (2009).
53. Seward, J.F., Zhang, J.X., Maupin, T.J., Mascola, L. & Jumaan, A.O. Contagiousness of varicella in vaccinated cases: a household contact study. *JAMA* **292**, 704-8 (2004).
54. Fox, J.P., Cooney, M.K., Hall, C.E. & Foy, H.M. Rhinoviruses in Seattle families, 1975-1979. *Am. J. Epidemiol.* **122**, 830-46 (1985).
55. Fox, J.P., Cooney, M.K. & Hall, C.E. The Seattle virus watch. V. Epidemiologic observations of rhinovirus infections, 1965-1969, in families with young children. *Am. J. Epidemiol.* **101**, 122-43 (1975).
56. Hirose, R. et al. Survival of SARS-CoV-2 and influenza virus on the human skin: Importance of hand hygiene in COVID-19. *Clin. Infect. Dis.* (2020).
57. Thomas, Y., Boquete-Suter, P., Koch, D., Pittet, D. & Kaiser, L. Survival of influenza virus on human fingers. *Clin. Microbiol. Infect.* **20**, O58-64 (2014).
58. Mukherjee, D.V. et al. Survival of influenza virus on hands and fomites in community and laboratory settings. *Am. J. Infect. Control* (2012).
59. Grayson, M.L. et al. Efficacy of soap and water and alcohol-based hand-rub preparations against live H1N1 influenza virus on the hands of human volunteers. *Clin. Infect. Dis.* **48**, 285-91 (2009).
60. Bean, B. et al. Survival of influenza viruses on environmental surfaces. *J. Infect. Dis.* **146**, 47-51 (1982).
61. Boone, S.A. & Gerba, C.P. Significance of fomites in the spread of respiratory and enteric viral disease. *Appl. Environ. Microbiol.* **73**, 1687-96 (2007).
62. Ansari, S.A., Springthorpe, V.S., Sattar, S.A., Rivard, S. & Rahman, M. Potential role of hands in the spread of respiratory viral infections: studies with human parainfluenza virus 3 and rhinovirus 14. *J. Clin. Microbiol.* **29**, 2115-9 (1991).
63. Hall, C.B., Douglas, R.G. & Geiman, J.M. Possible Transmission by Fomites of Respiratory Syncytial Virus. *J. Infect. Dis.* **141**, 98-102 (1980).

64. Levin, M.J., Leventhal, S. & Masters, H.A. Factors influencing quantitative isolation of varicella-zoster virus. *J. Clin. Microbiol.* **19**, 880-3 (1984).
65. L'Huillier, A.G. et al. Survival of rhinoviruses on human fingers. *Clin. Microbiol. Infect.* **21**, 381-5 (2015).
66. Pancic, F., Carpentier, D.C. & Came, P.E. Role of infectious secretions in the transmission of rhinovirus. *J. Clin. Microbiol.* **12**, 567-71 (1980).
67. Reed, S.E. An investigation of the possible transmission of Rhinovirus colds through indirect contact. *J. Hyg. (Lond.)* **75**, 249-58 (1975).
68. Yoshikawa, T. et al. Rapid contamination of the environments with varicella-zoster virus DNA from a patient with herpes zoster. *J. Med. Virol.* **63**, 64-6 (2001).
69. Asano, Y. et al. Spread of varicella-zoster virus DNA to family members and environments from siblings with varicella in a household. *Pediatrics* **103**, e61 (1999).
70. Winther, B., McCue, K., Ashe, K., Rubino, J.R. & Hendley, J.O. Environmental contamination with rhinovirus and transfer to fingers of healthy individuals by daily life activity. *J. Med. Virol.* **79**, 1606-1610 (2007).
71. Dick, E.C., Jennings, L.C., Mink, K.A., Wartgow, C.D. & Inhorn, S.L. Aerosol transmission of rhinovirus colds. *J. Infect. Dis.* **156**, 442-8 (1987).
72. Gwaltney, J.M., Jr., Moskalski, P.B. & Hendley, J.O. Hand-to-hand transmission of rhinovirus colds. *Ann. Intern. Med.* **88**, 463-7 (1978).
73. Hendley, J.O., Wenzel, R.P. & Gwaltney, J.M., Jr. Transmission of rhinovirus colds by self-inoculation. *N. Engl. J. Med.* **288**, 1361-4 (1973).
74. Turner, R.B. et al. Efficacy of organic acids in hand cleansers for prevention of rhinovirus infections. *Antimicrob. Agents Chemother.* **48**, 2595-8 (2004).
75. Bae, S.H. et al. Asymptomatic Transmission of SARS-CoV-2 on Evacuation Flight. *Emerg. Infect. Dis.* **26**, 2705-2708 (2020).
76. Ran, L. et al. Risk Factors of Healthcare Workers with Corona Virus Disease 2019: A Retrospective Cohort Study in a Designated Hospital of Wuhan in China. *Clin. Infect. Dis.* (2020).
77. Lau, J.T., Tsui, H., Lau, M. & Yang, X. SARS transmission, risk factors, and prevention in Hong Kong. *Emerg. Infect. Dis.* **10**, 587-92 (2004).
78. Teleman, M.D., Boudville, I.C., Heng, B.H., Zhu, D. & Leo, Y.S. Factors associated with transmission of severe acute respiratory syndrome among health-care workers in Singapore. *Epidemiol. Infect.* **132**, 797-803 (2004).
79. Saunders-Hastings, P., Crispo, J.A.G., Sikora, L. & Krewski, D. Effectiveness of personal protective measures in reducing pandemic influenza transmission: A systematic review and meta-analysis. *Epidemics* **20**, 1-20 (2017).
80. Kuster, S.P. et al. Risk factors for influenza among health care workers during 2009 pandemic, Toronto, Ontario, Canada. *Emerg. Infect. Dis.* **19**, 606-15 (2013).
81. Cheng, V.C.C. et al. Measles outbreak from Hong Kong International Airport to the hospital due to secondary vaccine failure in healthcare workers. *Infect. Control Hosp. Epidemiol.* **40**, 1407-1415 (2019).
82. Weedon, K.M. et al. The impact of infection control upon hospital-acquired influenza and respiratory syncytial virus. *Scand. J. Infect. Dis.* **45**, 297-303 (2013).
83. Leclair, J.M., Freeman, J., Sullivan, B.F., Crowley, C.M. & Goldmann, D.A. Prevention of Nosocomial Respiratory Syncytial Virus Infections through Compliance with Glove and Gown Isolation Precautions. *N. Engl. J. Med.* **317**, 329-334 (1987).
84. Dai, M. et al. Cross-infection of adenovirus among medical staff: A warning from the intensive care unit in a tertiary care teaching hospital in China. *Int. J. Infect. Dis.* **98**, 390-397 (2020).

85. Talaat, M. et al. Effects of hand hygiene campaigns on incidence of laboratory-confirmed influenza and absenteeism in schoolchildren, Cairo, Egypt. *Emerg. Infect. Dis.* **17**, 619-25 (2011).
86. Hendley, J.O. & Gwaltney, J.M., Jr. Mechanisms of transmission of rhinovirus infections. *Epidemiol. Rev.* **10**, 243-58 (1988).
87. Gwaltney, J.M., Jr., Moskalski, P.B. & Hendley, J.O. Interruption of experimental rhinovirus transmission. *J. Infect. Dis.* **142**, 811-5 (1980).
88. Ben-Shmuel, A. et al. Detection and infectivity potential of severe acute respiratory syndrome coronavirus 2 (SARS-CoV-2) environmental contamination in isolation units and quarantine facilities. *Clin. Microbiol. Infect.* (2020).
89. Biryukov, J. et al. Increasing Temperature and Relative Humidity Accelerates Inactivation of SARS-CoV-2 on Surfaces. *mSphere* **5** (2020).
90. Simmons, S.E. et al. Deactivation of SARS-CoV-2 with pulsed-xenon ultraviolet light: Implications for environmental COVID-19 control. *Infect. Control Hosp. Epidemiol.*, 1-4 (2020).
91. van Doremalen, N. et al. Aerosol and Surface Stability of SARS-CoV-2 as Compared with SARS-CoV-1. *N. Engl. J. Med.* **382**, 1564-1567 (2020).
92. Kampf, G., Todt, D., Pfaender, S. & Steinmann, E. Persistence of coronaviruses on inanimate surfaces and their inactivation with biocidal agents. *J. Hosp. Infect.* **104**, 246-251 (2020).
93. Lai, M.Y., Cheng, P.K. & Lim, W.W. Survival of severe acute respiratory syndrome coronavirus. *Clin. Infect. Dis.* **41**, e67-71 (2005).
94. Rabenau, H.F. et al. Stability and inactivation of SARS coronavirus. *Med. Microbiol. Immunol.* **194**, 1-6 (2005).
95. van Doremalen, N., Bushmaker, T. & Munster, V.J. Stability of Middle East respiratory syndrome coronavirus (MERS-CoV) under different environmental conditions. *Euro Surveill.* **18** (2013).
96. Sizun, J., Yu, M.W. & Talbot, P.J. Survival of human coronaviruses 229E and OC43 in suspension and after drying on surfaces: a possible source of hospital-acquired infections. *J. Hosp. Infect.* **46**, 55-60 (2000).
97. Meyers, C. et al. Ethanol and Isopropanol Inactivation of Human Coronavirus on Hard Surfaces. *J. Hosp. Infect.* (2020).
98. Warnes, S.L., Little, Z.R. & Keevil, C.W. Human Coronavirus 229E Remains Infectious on Common Touch Surface Materials. *mBio* **6**, e01697-15 (2015).
99. Yepiz-Gomez, M.S., Gerba, C.P. & Bright, K.R. Survival of Respiratory Viruses on Fresh Produce. *Food Environ. Virol.* (2013).
100. Thompson, K.A. & Bennett, A.M. Persistence of influenza on surfaces. *J. Hosp. Infect.* **95**, 194-199 (2017).
101. Perry, K.A. et al. Persistence of Influenza A (H1N1) Virus on Stainless Steel Surfaces. *Appl. Environ. Microbiol.* **82**, 3239-3245 (2016).
102. Oxford, J. et al. The survival of influenza A(H1N1)pdm09 virus on 4 household surfaces. *Am. J. Infect. Control* **42**, 423-5 (2014).
103. Greatorex, J.S. et al. Survival of Influenza A(H1N1) on Materials Found in Households: Implications for Infection Control. *PLoS One* **6**, e27932 (2011).
104. Thomas, Y. et al. Survival of Influenza Virus on Banknotes. *Appl. Environ. Microbiol.* **74**, 3002-3007 (2008).
105. Brady, M.T., Evans, J. & Cuartas, J. Survival and disinfection of parainfluenza viruses on environmental surfaces. *Am. J. Infect. Control* **18**, 18-23 (1990).
106. Tollefson, S.J., Cox, R.G. & Williams, J.V. Studies of culture conditions and environmental stability of human metapneumovirus. *Virus Res.* **151**, 54-9 (2010).



107. Sattar, S.A., Jacobsen, H., Springthorpe, V.S., Cusack, T.M. & Rubino, J.R. Chemical disinfection to interrupt transfer of rhinovirus type 14 from environmental surfaces to hands. *Appl. Environ. Microbiol.* **59**, 1579-85 (1993).
108. Jennings, L.C., Dick, E.C., Mink, K.A., Wartgow, C.D. & Inhorn, S.L. Near disappearance of rhinovirus along a fomite transmission chain. *J. Infect. Dis.* **158**, 888-92 (1988).
109. Sattar, S.A., Karim, Y.G., Springthorpe, V.S. & Johnson-Lussenburg, C.M. Survival of human rhinovirus type 14 dried onto nonporous inanimate surfaces: effect of relative humidity and suspending medium. *Can. J. Microbiol.* **33**, 802-6 (1987).
110. Verhaelen, K. et al. Virus transfer proportions between gloved fingertips, soft berries, and lettuce, and associated health risks. *Int. J. Food Microbiol.* **166**, 419-25 (2013).
111. Chia, P.Y. et al. Detection of air and surface contamination by SARS-CoV-2 in hospital rooms of infected patients. *Nat. Commun.* **11**, 2800 (2020).
112. Guo, Z.D. et al. Aerosol and Surface Distribution of Severe Acute Respiratory Syndrome Coronavirus 2 in Hospital Wards, Wuhan, China, 2020. *Emerg. Infect. Dis.* **26** (2020).
113. Luo, L. et al. Air and surface contamination in non-health care settings among 641 environmental specimens of 39 COVID-19 cases. *PLoS Negl. Trop. Dis.* **14**, e0008570 (2020).
114. Ong, S.W.X. et al. Air, Surface Environmental, and Personal Protective Equipment Contamination by Severe Acute Respiratory Syndrome Coronavirus 2 (SARS-CoV-2) From a Symptomatic Patient. *JAMA* (2020).
115. Razzini, K. et al. SARS-CoV-2 RNA detection in the air and on surfaces in the COVID-19 ward of a hospital in Milan, Italy. *Sci. Total Environ.* **742**, 140540 (2020).
116. Santarpia, J.L. et al. Aerosol and surface contamination of SARS-CoV-2 observed in quarantine and isolation care. *Sci. Rep.* **10**, 12732 (2020).
117. Zhou, B., She, J., Wang, Y. & Ma, X. The duration of viral shedding of discharged patients with severe COVID-19. *Clin. Infect. Dis.* (2020).
118. Booth, T.F. et al. Detection of airborne severe acute respiratory syndrome (SARS) coronavirus and environmental contamination in SARS outbreak units. *J. Infect. Dis.* **191**, 1472-7 (2005).
119. Chen, Y.C. et al. SARS in hospital emergency room. *Emerg. Infect. Dis.* **10**, 782-8 (2004).
120. Dowell, S.F. et al. Severe acute respiratory syndrome coronavirus on hospital surfaces. *Clin. Infect. Dis.* **39**, 652-7 (2004).
121. Bin, S.Y. et al. Environmental Contamination and Viral Shedding in MERS Patients During MERS-CoV Outbreak in South Korea. *Clin. Infect. Dis.* **62**, 755-60 (2016).
122. Kim, S.H. et al. Extensive Viable Middle East Respiratory Syndrome (MERS) Coronavirus Contamination in Air and Surrounding Environment in MERS Isolation Wards. *Clin. Infect. Dis.* **63**, 363-9 (2016).
123. Ikonen, N. et al. Deposition of respiratory virus pathogens on frequently touched surfaces at airports. *BMC Infect. Dis.* **18**, 437 (2018).
124. Memish, Z.A. et al. Environmental sampling for respiratory pathogens in Jeddah airport during the 2013 Hajj season. *Am. J. Infect. Control* **42**, 1266-9 (2014).
125. Bonny, T.S., Yezli, S. & Lednicky, J.A. Isolation and identification of human coronavirus 229E from frequently touched environmental surfaces of a university classroom that is cleaned daily. *Am. J. Infect. Control* **46**, 105-107 (2018).
126. Fong, M.W. et al. Presence of Influenza Virus on Touch Surfaces in Kindergartens and Primary Schools. *J. Infect. Dis.* **222**, 1329-1333 (2020).
127. Killingley, B. et al. The environmental deposition of influenza virus from patients infected with influenza A(H1N1)pdm09: Implications for infection prevention and control. *J. Infect. Public Health* **9**, 278-88 (2016).
128. Boone, S.A. & Gerba, C.P. The occurrence of influenza A virus on household and day care center fomites. *J. Infect.* **51**, 103-9 (2005).

129. Bischoff, W.E. et al. Detection of Measles Virus RNA in Air and Surface Specimens in a Hospital Setting. *J. Infect. Dis.* **213**, 600-3 (2016).
130. Stobnicka, A. et al. Prevalence of Human Parainfluenza Viruses and Noroviruses Genomes on Office Fomites. *Food Environ. Virol.* **10**, 133-140 (2018).
131. Boone, S.A. & Gerba, C.P. The Prevalence of Human Parainfluenza Virus 1 on Indoor Office Fomites. *Food Environ. Virol.* **2**, 41-46 (2010).
132. Luby, S.P. et al. Hand contamination with human rhinovirus in Bangladesh. *J. Med. Virol.* **86**, 2177-2180 (2014).
133. Pappas, D.E., Hendley, J.O. & Schwartz, R.H. Respiratory viral RNA on toys in pediatric office waiting rooms. *Pediatr. Infect. Dis. J.* **29**, 102-4 (2010).
134. Ganime, A.C. et al. Viability of human adenovirus from hospital fomites. *J. Med. Virol.* **86**, 2065-9 (2014).
135. D'Arcy, N., Cloutman-Green, E., Klein, N. & Spratt, D.A. Environmental viral contamination in a pediatric hospital outpatient waiting area: implications for infection control. *Am. J. Infect. Control* **42**, 856-60 (2014).
136. Gwaltney, J.M. & Hendley, J.O. Transmission of Experimental Rhinovirus Infection by Contaminated Surfaces. *Am. J. Epidemiol.* **116**, 828-833 (1982).
137. Pitol, A.K., Bichel, H.N., Boehm, A.B., Kohn, T. & Julian, T.R. Transfer of Enteric Viruses Adenovirus and Coxsackievirus and Bacteriophage MS2 from Liquid to Human Skin. *Appl. Environ. Microbiol.* **84** (2018).
138. Wang, Y. et al. Reduction of secondary transmission of SARS-CoV-2 in households by face mask use, disinfection and social distancing: a cohort study in Beijing, China. *BMJ Global Health* **5**, e002794 (2020).
139. Heung, L.C., Li, T., Mak, S.K. & Chan, W.M. Prevalence of subclinical infection and transmission of severe acute respiratory syndrome (SARS) in a residential care home for the elderly. *Hong Kong Med. J.* **12**, 201-7 (2006).
140. Lopez, A.S. et al. Transmission of a newly characterized strain of varicella-zoster virus from a patient with herpes zoster in a long-term-care facility, West Virginia, 2004. *J. Infect. Dis.* **197**, 646-53 (2008).
141. Hall, C.B. & Douglas, R.G., Jr. Modes of transmission of respiratory syncytial virus. *J. Pediatr.* **99**, 100-3 (1981).
142. Kormuth, K.A. et al. Environmental Persistence of Influenza Viruses Is Dependent upon Virus Type and Host Origin. *mSphere* **4** (2019).
143. Kormuth, K.A. et al. Influenza Virus Infectivity Is Retained in Aerosols and Droplets Independent of Relative Humidity. *J. Infect. Dis.* (2018).
144. Noti, J.D. et al. Detection of infectious influenza virus in cough aerosols generated in a simulated patient examination room. *Clin. Infect. Dis.* **54**, 1569-77 (2012).
145. McLean, D.M., Bannatyne, R.M. & Givan, K.F. Myxovirus dissemination by air. *Can. Med. Assoc. J.* **96**, 1449-53 (1967).
146. Leung, N.H.L. et al. Respiratory virus shedding in exhaled breath and efficacy of face masks. *Nat. Med.* **26**, 676-680 (2020).
147. Gralton, J., Tovey, E.R., McLaws, M.L. & Rawlinson, W.D. Respiratory virus RNA is detectable in airborne and droplet particles. *J. Med. Virol.* **85**, 2151-9 (2013).
148. Milton, D.K., Fabian, M.P., Cowling, B.J., Grantham, M.L. & McDevitt, J.J. Influenza virus aerosols in human exhaled breath: particle size, culturability, and effect of surgical masks. *PLoS Pathog.* **9**, e1003205 (2013).
149. Lindsley, W.G. et al. Measurements of Airborne Influenza Virus in Aerosol Particles from Human Coughs. *PLoS One* **5**, e15100 (2010).
150. Yan, J. et al. Infectious virus in exhaled breath of symptomatic seasonal influenza cases from a college community. *Proc. Natl. Acad. Sci. U. S. A.* **115**, 1081-1086 (2018).

151. Phan, L.T. et al. Respiratory viruses in the patient environment. *Infect. Control Hosp. Epidemiol.* **41**, 259-266 (2020).
152. Bischoff, W.E., Swett, K., Leng, I. & Peters, T.R. Exposure to influenza virus aerosols during routine patient care. *J. Infect. Dis.* **207**, 1037-46 (2013).
153. Shiu, E.Y.C. et al. Frequent recovery of influenza A but not influenza B virus RNA in aerosols in pediatric patient rooms. *Indoor Air* **30**, 805-815 (2020).
154. Xie, C. et al. Detection of influenza and other respiratory viruses in air sampled from a university campus: a longitudinal study. *Clin. Infect. Dis.* (2019).
155. Yip, L. et al. Influenza virus RNA recovered from droplets and droplet nuclei emitted by adults in an acute care setting. *J. Occup. Environ. Hyg.* **16**, 341-348 (2019).
156. Lindsley, W.G. et al. Distribution of airborne influenza virus and respiratory syncytial virus in an urgent care medical clinic. *Clin. Infect. Dis.* **50**, 693-8 (2010).
157. Blachere, F.M. et al. Measurement of airborne influenza virus in a hospital emergency department. *Clin. Infect. Dis.* **48**, 438-440 (2009).
158. Coleman, K.K. et al. Bioaerosol Sampling for Respiratory Viruses in Singapore's Mass Rapid Transit Network. *Sci. Rep.* **8**, 17476 (2018).
159. Grayson, S.A., Griffiths, P.S., Perez, M.K. & Piedimonte, G. Detection of airborne respiratory syncytial virus in a pediatric acute care clinic. *Pediatr. Pulmonol.* **52**, 684-688 (2017).
160. Yadana, S. et al. Monitoring for airborne respiratory viruses in a general pediatric ward in Singapore. *J. Public Health Res.* **8**, 1407 (2019).
161. Kulkarni, H. et al. Evidence of Respiratory Syncytial Virus Spread by Aerosol. Time to Revisit Infection Control Strategies? *Am. J. Respir. Crit. Care Med.* **194**, 308-16 (2016).
162. Akerlund, A. et al. Mucosal exudation of fibrinogen in coronavirus-induced common colds. *Acta Otolaryngol.* **113**, 642-8 (1993).
163. Tyrrell, D.A., Cohen, S. & Schlarb, J.E. Signs and symptoms in common colds. *Epidemiol. Infect.* **111**, 143-56 (1993).
164. Callow, K.A. et al. Influence of atopy on the clinical manifestations of coronavirus infection in adult volunteers. *Clin. Allergy* **18**, 119-29 (1988).
165. Memoli, M.J. et al. Validation of the wild-type influenza A human challenge model H1N1pdMIST: an A(H1N1)pdm09 dose-finding investigational new drug study. *Clin. Infect. Dis.* **60**, 693-702 (2015).
166. Murphy, A.W., Platts-Mills, T.A., Lobo, M. & Hayden, F. Respiratory nitric oxide levels in experimental human influenza. *Chest* **114**, 452-6 (1998).
167. Henle, W., Henle, G., Stokes Jr., J. & Maris, E.P. Experimental exposure of human subjects to viruses of influenza. *J. Immunol.* **52**, 145-65 (1946).
168. Nguyen-Van-Tam, J.S. et al. Minimal transmission in an influenza A (H3N2) human challenge-transmission model within a controlled exposure environment. *PLoS Pathog.* **16**, e1008704 (2020).
169. Han, A. et al. A Dose-finding Study of a Wild-type Influenza A(H3N2) Virus in a Healthy Volunteer Human Challenge Model. *Clin. Infect. Dis.* **69**, 2082-2090 (2019).
170. Killingley, B. et al. Use of a human influenza challenge model to assess person-to-person transmission: proof-of-concept study. *J. Infect. Dis.* **205**, 35-43 (2012).
171. Clements, M.L., O'Donnell, S., Levine, M.M., Chanock, R.M. & Murphy, B.R. Dose response of A/Alaska/6/77 (H3N2) cold-adapted reassortant vaccine virus in adult volunteers: role of local antibody in resistance to infection with vaccine virus. *Infect. Immun.* **40**, 1044-51 (1983).
172. Richman, D.D. et al. Temperature-Sensitive Mutants of Influenza A Virus. XII. Safety, Antigenicity, Transmissibility, and Efficacy of Influenza A/Udorn/72-ts-1[E] Recombinant Viruses in Human Adults. *J. Infect. Dis.* **134**, 585-594 (1976).

173. Murphy, B.R., Chalhub, E.G., Nusinoff, S.R., Kasel, J. & Chanock, R.M. Temperature-Sensitive Mutants of Influenza-Virus .3. Further Characterization of Ts-1[E] Influenza a Recombinant (H3n2) Virus in Man. *J. Infect. Dis.* **128**, 479-487 (1973).
174. DeVincenzo, J.P. et al. Viral load drives disease in humans experimentally infected with respiratory syncytial virus. *Am. J. Respir. Crit. Care Med.* **182**, 1305-14 (2010).
175. Lee, F.E., Walsh, E.E., Falsey, A.R., Betts, R.F. & Treanor, J.J. Experimental infection of humans with A2 respiratory syncytial virus. *Antiviral Res.* **63**, 191-6 (2004).
176. Buchman, C.A., Doyle, W.J., Pilcher, O., Gentile, D.A. & Skoner, D.P. Nasal and otologic effects of experimental respiratory syncytial virus infection in adults. *Am. J. Otolaryngol.* **23**, 70-5 (2002).
177. Hall, C.B., Douglas, R.G., Schnabel, K.C. & Geiman, J.M. Infectivity of respiratory syncytial virus by various routes of inoculation. *Infect. Immun.* **33**, 779-783 (1981).
178. Talaat, K.R. et al. Experimental infection of adults with recombinant wild-type human metapneumovirus. *J. Infect. Dis.* **208**, 1669-78 (2013).
179. Prather, A.A., Janicki-Deverts, D., Hall, M.H. & Cohen, S. Behaviorally Assessed Sleep and Susceptibility to the Common Cold. *Sleep* **38**, 1353-9 (2015).
180. Cohen, S., Doyle, W.J., Alper, C.M., Janicki-Deverts, D. & Turner, R.B. Sleep habits and susceptibility to the common cold. *Arch. Intern. Med.* **169**, 62-7 (2009).
181. Bardin, P.G. et al. Amplified rhinovirus colds in atopic subjects. *Clin. Exp. Allergy* **24**, 457-64 (1994).
182. Andersen, I. et al. Induced rhinovirus infection under controlled exposure to sulfur dioxide. *Arch. Environ. Health* **32**, 120-5 (1977).
183. Couch, R.B., Cate, T.R., Douglas, R.G., Gerone, P.J. & Knight, V. Effect of route of inoculation on experimental respiratory viral disease in volunteers and evidence for airborne transmission. *Bacteriol. Rev.* **30**, 517-& (1966).
184. Couch, R.B., Cate, T.R., Fleet, W.F., Gerone, P.J. & Knight, V. Aerosol-induced adenoviral illness resembling the naturally occurring illness in military recruits. *Am. Rev. Respir. Dis.* **93**, 529-35 (1966).
185. Fears, A.C. et al. Persistence of Severe Acute Respiratory Syndrome Coronavirus 2 in Aerosol Suspensions. *Emerg. Infect. Dis.* **26** (2020).
186. Schuit, M. et al. Airborne SARS-CoV-2 Is Rapidly Inactivated by Simulated Sunlight. *J. Infect. Dis.* **222**, 564-571 (2020).
187. Smither, S.J., Eastaugh, L.S., Findlay, J.S. & Lever, M.S. Experimental aerosol survival of SARS-CoV-2 in artificial saliva and tissue culture media at medium and high humidity. *Emerg. Microbes Infect.* **9**, 1415-1417 (2020).
188. Ijaz, M.K., Brunner, A.H., Sattar, S.A., Nair, R.C. & Johnson-Lussenburg, C.M. Survival characteristics of airborne human coronavirus 229E. *J. Gen. Virol.* **66 ( Pt 12)**, 2743-8 (1985).
189. Brown, J.R. et al. Influenza virus survival in aerosols and estimates of viable virus loss resulting from aerosolization and air-sampling. *J. Hosp. Infect.* (2015).
190. De Jong, J.G. & Winkler, K.C. Survival of Measles Virus in Air. *Nature* **201**, 1054-5 (1964).
191. Miller, W.S. & Artenstein, M.S. Aerosol stability of three acute respiratory disease viruses. *Proc. Soc. Exp. Biol. Med.* **125**, 222-7 (1967).
192. Cruz-Sanchez, T.M. et al. Formation of a stable mimic of ambient particulate matter containing viable infectious respiratory syncytial virus and its dry-deposition directly onto cell cultures. *Anal. Chem.* **85**, 898-906 (2013).
193. Rechsteiner, J. & Winkler, K.C. Inactivation of Respiratory Syncytial Virus in Aerosol. *J. Gen. Virol.* **5**, 405-410 (1969).
194. Walker, C.M. & Ko, G. Effect of ultraviolet germicidal irradiation on viral aerosols. *Environ. Sci. Technol.* **41**, 5460-5 (2007).

195. Lindsley, W.G. et al. Viable influenza A virus in airborne particles expelled during coughs versus exhalations. *Influenza Other Respir. Viruses* **10**, 404-13 (2016).
196. Liu, Y. et al. Aerodynamic analysis of SARS-CoV-2 in two Wuhan hospitals. *Nature* **582**, 557-560 (2020).
197. Pan, M. et al. Collection of Viable Aerosolized Influenza Virus and Other Respiratory Viruses in a Student Health Care Center through Water-Based Condensation Growth. *mSphere* **2** (2017).
198. Leung, N.H. et al. Quantification of Influenza Virus RNA in Aerosols in Patient Rooms. *PLoS One* **11**, e0148669 (2016).
199. Wan, G.H. et al. Detection of Common Respiratory Viruses and Mycoplasma pneumoniae in Patient-Occupied Rooms in Pediatric Wards. *Medicine (Baltimore)* **95**, e3014 (2016).
200. Aintablian, N., Walpita, P. & Sawyer, M.H. Detection of Bordetella pertussis and respiratory syncytial virus in air samples from hospital rooms. *Infect. Control Hosp. Epidemiol.* **19**, 918-23 (1998).
201. Sawyer, M.H., Chamberlin, C.J., Wu, Y.N., Aintablian, N. & Wallace, M.R. Detection of varicella-zoster virus DNA in air samples from hospital rooms. *J. Infect. Dis.* **169**, 91-4 (1994).
202. Lednicky, J.A. et al. Viable SARS-CoV-2 in the air of a hospital room with COVID-19 patients. *Int. J. Infect. Dis.* (2020).
203. Alford, R.H., Kasel, J.A., Gerone, P.J. & Knight, V. Human influenza resulting from aerosol inhalation. *Proc. Soc. Exp. Biol. Med.* **122**, 800-4 (1966).
204. Couch, R.B., Knight, V., Douglas, R.G., Jr., Black, S.H. & Hamory, B.H. The minimal infectious dose of adenovirus type 4; the case for natural transmission by viral aerosol. *Trans. Am. Clin. Climatol. Assoc.* **80**, 205-11 (1969).
205. Li, Y. et al. Evidence for probable aerosol transmission of SARS-CoV-2 in a poorly ventilated restaurant. Preprint at <https://www.medrxiv.org/content/medrxiv/early/2020/04/22/2020.04.16.20067728.full.pdf> (2020).
206. Shen, Y. et al. Community Outbreak Investigation of SARS-CoV-2 Transmission Among Bus Riders in Eastern China. *JAMA Intern. Med.* (2020).
207. Yu, I.T. et al. Evidence of airborne transmission of the severe acute respiratory syndrome virus. *N. Engl. J. Med.* **350**, 1731-9 (2004).
208. Olsen, S.J. et al. Transmission of the severe acute respiratory syndrome on aircraft. *N. Engl. J. Med.* **349**, 2416-22 (2003).
209. Sung, M. et al. Airflow as a Possible Transmission Route of Middle East Respiratory Syndrome at an Initial Outbreak Hospital in Korea. *Int. J. Environ. Res. Public Health* **15** (2018).
210. Cho, S.Y. et al. MERS-CoV outbreak following a single patient exposure in an emergency room in South Korea: an epidemiological outbreak study. *Lancet* **388**, 994-1001 (2016).
211. Wong, B.C. et al. Possible role of aerosol transmission in a hospital outbreak of influenza. *Clin. Infect. Dis.* **51**, 1176-83 (2010).
212. Moser, M.R. et al. An outbreak of influenza aboard a commercial airliner. *Am. J. Epidemiol.* **110**, 1-6 (1979).
213. Bloch, A.B. et al. Measles outbreak in a pediatric practice: airborne transmission in an office setting. *Pediatrics* **75**, 676-83 (1985).
214. Remington, P.L., Hall, W.N., Davis, I.H., Herald, A. & Gunn, R.A. Airborne transmission of measles in a physician's office. *JAMA* **253**, 1574-7 (1985).
215. Menkhaus, N.A., Lanphear, B. & Linnemann, C.C. Airborne transmission of varicella-zoster virus in hospitals. *Lancet* **336**, 1315 (1990).
216. Josephson, A. & Gombert, M.E. Airborne transmission of nosocomial varicella from localized zoster. *J. Infect. Dis.* **158**, 238-41 (1988).

217. Gustafson, T.L. et al. An outbreak of airborne nosocomial varicella. *Pediatrics* **70**, 550-6 (1982).
218. Leclair, J.M., Zaia, J.A., Levin, M.J., Congdon, R.G. & Goldmann, D.A. Airborne transmission of chickenpox in a hospital. *N. Engl. J. Med.* **302**, 450-453 (1980).
219. Wells, W.F., Wells, M.W. & Wilder, T.S. The environmental control of epidemic contagion: I. An epidemiologic study of radiant disinfection of air in day schools. *Am. J. Epidemiol.* **35**, 97-121 (1942).
220. World Health Organization. Transmission of SARS-CoV-2: implications for infection prevention precautions: scientific brief, 9 July 2020. <https://apps.who.int/iris/handle/10665/333114> (2020).
221. World Health Organization. Infection prevention and control of epidemic-and pandemic prone acute respiratory infections in health care - WHO guidelines. [http://www.who.int/csr/bioriskreduction/infection\\_control/publication/en/](http://www.who.int/csr/bioriskreduction/infection_control/publication/en/) (2014).
222. World Health Organization. Infection prevention and control during health care for probable or confirmed cases of Middle East respiratory syndrome coronavirus (MERS-CoV) infection: Interim guidance (Updated October 2019). <https://apps.who.int/iris/handle/10665/174652> (2019).
223. World Health Organization. Guide for clinical case management and infection prevention and control during a measles outbreak. <https://www.who.int/immunization/documents/9789240002869/en/> (2020).
224. World Health Organization. Prevention of hospital-acquired infections, 2nd edition. A practical guide. [http://www.who.int/csr/resources/publications/WHO\\_CDS\\_CSR\\_EPH\\_2002\\_12/en/](http://www.who.int/csr/resources/publications/WHO_CDS_CSR_EPH_2002_12/en/) (2002).
225. Boyce, J.M. & Pittet, D. Guideline for hand hygiene in health-care settings. *Am. J. Infect. Control* **30**, S1-S46 (2002).
226. Kratzel, A. et al. Inactivation of Severe Acute Respiratory Syndrome Coronavirus 2 by WHO-Recommended Hand Rub Formulations and Alcohols. *Emerg. Infect. Dis.* **26** (2020).
227. Suchomel, M., Steinmann, J. & Kampf, G. Efficacies of the original and modified WHO-recommended hand rub formulations. *J. Hosp. Infect.* (2020).
228. Siddharta, A. et al. Virucidal Activity of World Health Organization–Recommended Formulations Against Enveloped Viruses, Including Zika, Ebola, and Emerging Coronaviruses. *J. Infect. Dis.* **215**, 902-906 (2017).
229. Sattar, S.A. et al. Activity of an alcohol-based hand gel against human adeno-, rhino-, and rotaviruses using the fingerpad method. *Infect. Control Hosp. Epidemiol.* **21**, 516-9 (2000).
230. World Health Organization. WHO Guidelines on Hand Hygiene in Health Care. (Geneva, Switzerland, 2009).
231. Al-Ansary, L.A. et al. Physical interventions to interrupt or reduce the spread of respiratory viruses. Part 2 - Hand hygiene and other hygiene measures: systematic review and meta-analysis. Preprint at <https://www.medrxiv.org/content/medrxiv/early/2020/04/20/2020.04.14.20065250.full.pdf> (2020).
232. Xiao, J. et al. Nonpharmaceutical Measures for Pandemic Influenza in Nonhealthcare Settings–Personal Protective and Environmental Measures. *Emerg. Infect. Dis.* **26** (2020).
233. Aiello, A.E., Coulborn, R.M., Perez, V. & Larson, E.L. Effect of hand hygiene on infectious disease risk in the community setting: a meta-analysis. *Am. J. Public Health* **98**, 1372-81 (2008).
234. Cowling, B.J. et al. Aerosol transmission is an important mode of influenza A virus spread. *Nat. Commun.* **4**, 1935 (2013).
235. Cowling, B.J. et al. Facemasks and hand hygiene to prevent influenza transmission in households: a cluster randomized trial. *Ann. Intern. Med.* **151**, 437-46 (2009).

236. Diaz, K.T. & Smaldone, G.C. Quantifying exposure risk: surgical masks and respirators. *Am. J. Infect. Control* **38**, 501-8 (2010).
237. Kwok, Y.L.A., Gralton, J. & McLaws, M.-L. Face touching: A frequent habit that has implications for hand hygiene. *Am. J. Infect. Control* **43**, 112-114 (2015).
238. Davies, A. et al. Testing the efficacy of homemade masks: would they protect in an influenza pandemic? *Disaster Med. Public Health Prep.* **7**, 413-8 (2013).
239. Makison Booth, C., Clayton, M., Crook, B. & Gawn, J.M. Effectiveness of surgical masks against influenza bioaerosols. *J. Hosp. Infect.* **84**, 22-6 (2013).
240. Harnish, D.A. et al. Capture of 0.1-mum aerosol particles containing viable H1N1 influenza virus by N95 filtering facepiece respirators. *J. Occup. Environ. Hyg.* **13**, D46-9 (2016).
241. Harnish, D.A. et al. Challenge of N95 filtering facepiece respirators with viable H1N1 influenza aerosols. *Infect. Control Hosp. Epidemiol.* **34**, 494-9 (2013).
242. Chu, D.K. et al. Physical distancing, face masks, and eye protection to prevent person-to-person transmission of SARS-CoV-2 and COVID-19: a systematic review and meta-analysis. *Lancet* **395**, 1973-1987 (2020).
243. Offeddu, V., Yung, C.F., Low, M.S.F. & Tam, C.C. Effectiveness of Masks and Respirators Against Respiratory Infections in Healthcare Workers: A Systematic Review and Meta-Analysis. *Clin. Infect. Dis.* **65**, 1934-1942 (2017).
244. Jefferson, T. et al. Physical interventions to interrupt or reduce the spread of respiratory viruses. Part 1 - Face masks, eye protection and person distancing: systematic review and meta-analysis. Preprint at <https://www.medrxiv.org/content/medrxiv/early/2020/04/07/2020.03.30.20047217.full.pdf> (2020).
245. MacIntyre, C.R. & Chughtai, A.A. Facemasks for the prevention of infection in healthcare and community settings. *BMJ* **350**, h694 (2015).
246. Cowling, B.J., Zhou, Y., Ip, D.K., Leung, G.M. & Aiello, A.E. Face masks to prevent transmission of influenza virus: a systematic review. *Epidemiol. Infect.* **138**, 449-56 (2010).
247. Jeong, E.K., Bae, J.E. & Kim, I.S. Inactivation of influenza A virus H1N1 by disinfection process. *Am. J. Infect. Control* **38**, 354-360 (2010).
248. Greatorex, J.S. et al. Effectiveness of common household cleaning agents in reducing the viability of human influenza A/H1N1. *PLoS One* **5**, e8987 (2010).
249. Tuladhar, E. et al. Residual viral and bacterial contamination of surfaces after cleaning and disinfection. *Appl. Environ. Microbiol.* (2012).
250. Wei, J. & Li, Y. Airborne spread of infectious agents in the indoor environment. *Am. J. Infect. Control* **44**, S102-8 (2016).
251. Ibfelt, T., Engelund, E.H., Schultz, A.C. & Andersen, L.P. Effect of cleaning and disinfection of toys on infectious diseases and micro-organisms in daycare nurseries. *J. Hosp. Infect.* **89**, 109-15 (2015).
252. Sandora, T.J., Shih, M.C. & Goldmann, D.A. Reducing absenteeism from gastrointestinal and respiratory illness in elementary school students: a randomized, controlled trial of an infection-control intervention. *Pediatrics* **121**, e1555-62 (2008).
253. The American Society of Heating, Refrigerating and Air-Conditioning Engineers (ASHRAE). 2017 ASHRAE Handbook -- Fundamentals (SI). (2017).
254. Myatt, T.A. et al. Detection of Airborne Rhinovirus and Its Relation to Outdoor Air Supply in Office Environments. *Am. J. Respir. Crit. Care Med.* **169**, 1187-1190 (2004).
255. Sundell, J. et al. Ventilation rates and health: multidisciplinary review of the scientific literature. *Indoor Air* **21**, 191-204 (2011).
256. Li, Y. et al. Role of ventilation in airborne transmission of infectious agents in the built environment - a multidisciplinary systematic review. *Indoor Air* **17**, 2-18 (2007).
257. Luongo, J.C. et al. Role of mechanical ventilation in the airborne transmission of infectious agents in buildings. *Indoor Air* **26**, 666-78 (2016).

258. Chen, C., Zhao, B., Yang, X. & Li, Y. Role of two-way airflow owing to temperature difference in severe acute respiratory syndrome transmission: revisiting the largest nosocomial severe acute respiratory syndrome outbreak in Hong Kong. *J. R. Soc. Interface* **8**, 699-710 (2011).
259. Sehulster, L.M. et al. Guidelines for Environmental Infection Control in Health-Care Facilities. Recommendations of CDC and the Healthcare Infection Control Practices Advisory Committee (HICPAC). <https://www.cdc.gov/infectioncontrol/pdf/guidelines/environmental-guidelines-P.pdf> (2004).
260. Sze To, G.N., Wan, M.P., Chao, C.Y.H., Fang, L. & Melikov, A. Experimental Study of Dispersion and Deposition of Expiratory Aerosols in Aircraft Cabins and Impact on Infectious Disease Transmission. *Aerosol Sci. Technol.* **43**, 466-485 (2009).
261. Nardell, E.A., Keegan, J., Cheney, S.A. & Etkind, S.C. Airborne infection. Theoretical limits of protection achievable by building ventilation. *Am. Rev. Respir. Dis.* **144**, 302-6 (1991).
262. Memarzadeh, F. & Xu, W. Role of air changes per hour (ACH) in possible transmission of airborne infections. *Build. Simul.* **5**, 15-28 (2012).
263. Centers for Disease Control and Prevention. Environmental Control for Tuberculosis: Basic Upper-Room Ultraviolet Germicidal Irradiation Guidelines for Healthcare Settings. <https://www.cdc.gov/niosh/docs/2009-105/default.html> (2009).
264. Kowalski, W.J. Ultraviolet germicidal irradiation handbook : UVGI for air and surface disinfection (Springer-Verlag, Heidelberg ; New York, 2009).
265. Reed, N.G. The History of Ultraviolet Germicidal Irradiation for Air Disinfection. *Public Health Rep.* **125**, 15-27 (2010).
266. Dancer, S.J. Controlling Hospital-Acquired Infection: Focus on the Role of the Environment and New Technologies for Decontamination. *Clin. Microbiol. Rev.* **27**, 665-690 (2014).
267. McDevitt, J.J., Rudnick, S.N. & Radonovich, L.J. Aerosol susceptibility of influenza virus to UV-C light. *Appl. Environ. Microbiol.* **78**, 1666-9 (2012).
268. Buonanno, M., Welch, D., Shuryak, I. & Brenner, D.J. Far-UVC light (222 nm) efficiently and safely inactivates airborne human coronaviruses. *Sci. Rep.* **10**, 10285 (2020).
269. McDevitt, J.J. et al. Characterization of UVC light sensitivity of vaccinia virus. *Appl. Environ. Microbiol.* **73**, 5760-6 (2007).
270. Bedell, K., Buchaklian, A.H. & Perlman, S. Efficacy of an Automated Multiple Emitter Whole-Room Ultraviolet-C Disinfection System Against Coronaviruses MHV and MERS-CoV. *Infect. Control Hosp. Epidemiol.* **37**, 598-9 (2016).
271. McDevitt, J.J., Milton, D.K., Rudnick, S.N. & First, M.W. Inactivation of poxviruses by upper-room UVC light in a simulated hospital room environment. *PLoS One* **3**, e3186 (2008).
272. Mills, D., Harnish, D.A., Lawrence, C., Sandoval-Powers, M. & Heimbuch, B.K. Ultraviolet germicidal irradiation of influenza-contaminated N95 filtering facepiece respirators. *Am. J. Infect. Control* **46**, e49-e55 (2018).
273. Seresirikachorn, K. et al. Decontamination and reuse of surgical masks and N95 filtering facepiece respirators during the COVID-19 pandemic: A systematic review. *Infect. Control Hosp. Epidemiol.*, 1-6 (2020).
274. Jordan, W.S., Jr. The mechanism of spread of Asian influenza. *Am. Rev. Respir. Dis.* **83(2)Pt 2**, 29-40 (1961).
